# Supplementary material
Source: HighWire-hosted journal article supplement (https://www.cfp.ca/highwire/filestream/33331/field_highwire_adjunct_files/1/339_Appendix_eng.pdf)
Supplement: 339_Appendix_eng.pdf [file 339_Appendix_eng.pdf]

**Appendix 1. Expertise, roles and responsibilities, and conflicts of interest for the guideline development team members and support staff.**

| <b>Name</b>                               | <b>Expertise</b>                                                                                 | <b>Guideline Role and Section Responsibilities</b>                                                                                                                                                                     | <b>Conflict(s) of Interest</b>                                                                                                                                                                                                                                                                                                                                          |
|-------------------------------------------|--------------------------------------------------------------------------------------------------|------------------------------------------------------------------------------------------------------------------------------------------------------------------------------------------------------------------------|-------------------------------------------------------------------------------------------------------------------------------------------------------------------------------------------------------------------------------------------------------------------------------------------------------------------------------------------------------------------------|
| <b>Guideline development team members</b> |                                                                                                  |                                                                                                                                                                                                                        |                                                                                                                                                                                                                                                                                                                                                                         |
| Kevin Pottie                              | Family physician, WHO GRADE working group member                                                 | <ul style="list-style-type: none"> <li>• Overall lead</li> <li>• GRADE methods lead</li> <li>• Recommendations</li> <li>• Systematic review</li> <li>• Clinical considerations</li> <li>• Gaps in knowledge</li> </ul> | None declared                                                                                                                                                                                                                                                                                                                                                           |
| Barbara Farrell                           | Pharmacist (Geriatric Day Hospital, lead on the Deprescribing guidelines in the elderly project) | <ul style="list-style-type: none"> <li>• Patient values and preferences</li> <li>• Clinical considerations</li> <li>• Implementation</li> </ul>                                                                        | Received research funding for the purposes of developing this guideline; received financial payments from Institute for Healthcare Improvement and Commonwealth Fund for deprescribing guidelines summary and from Ontario Long-Term Care Physicians Association, Ontario Pharmacists Association and Canadian Society of Hospital Pharmacists for speaking engagements |
| Simon Davies                              | Psychiatrist and psychopharmacology                                                              | <ul style="list-style-type: none"> <li>• Introduction</li> <li>• Clinical considerations</li> </ul>                                                                                                                    | None declared                                                                                                                                                                                                                                                                                                                                                           |
| Anne Holbrook                             | Clinical pharmacology & toxicology, Internal Medicine, Research methods                          | <ul style="list-style-type: none"> <li>• Resource implications</li> </ul>                                                                                                                                              | None declared                                                                                                                                                                                                                                                                                                                                                           |
| Vivian Welch                              | Clinical epidemiology methodologist, GRADE, systematic reviews                                   | <ul style="list-style-type: none"> <li>• Systematic review</li> <li>• GRADE review</li> <li>• Methods</li> </ul>                                                                                                       | None declared                                                                                                                                                                                                                                                                                                                                                           |

|                        |                                                                        |                                                                                                                                                          |                                                                                                                                                                                                                                                                               |
|------------------------|------------------------------------------------------------------------|----------------------------------------------------------------------------------------------------------------------------------------------------------|-------------------------------------------------------------------------------------------------------------------------------------------------------------------------------------------------------------------------------------------------------------------------------|
| Jean Grenier           | Clinical psychologist                                                  | <ul style="list-style-type: none"> <li>• Introduction</li> <li>• Clinical considerations</li> </ul>                                                      | None declared                                                                                                                                                                                                                                                                 |
| Robert Swenson         | Psychiatrist                                                           | <ul style="list-style-type: none"> <li>• Introduction</li> <li>• Clinical considerations</li> </ul>                                                      | None declared                                                                                                                                                                                                                                                                 |
| Cynthia Boyd           | Geriatrician, care of cormorbid chronically ill and frail older adults | <ul style="list-style-type: none"> <li>• Clinical considerations</li> </ul>                                                                              | <p>PCORI funding for a project related to improving patient centered care for people with multiple chronic conditions</p> <p>NIH funding for a project related to medication regimen complexity in home health care</p>                                                       |
| Cheryl Sadowski        | Pharmacist, geriatric pharmacotherapy                                  | <ul style="list-style-type: none"> <li>• Review of harms</li> <li>• Clinical considerations</li> <li>• Other guidelines</li> </ul>                       | <p>Primary investigator on an unrestricted grant from Pfizer Canada for: A novel strategy to address the underdiagnosis and undertreatment of overactive bladder and urinary tract symptoms</p> <p>Member of Alberta Expert Committee on Drug Evaluation and Therapeutics</p> |
| <b>Support persons</b> |                                                                        |                                                                                                                                                          |                                                                                                                                                                                                                                                                               |
| Wade Thompson          | Pharmacist (long-term care)                                            | <ul style="list-style-type: none"> <li>• Guideline coordinator</li> <li>• Systematic review</li> <li>• Summary of findings</li> <li>• Methods</li> </ul> | None declared                                                                                                                                                                                                                                                                 |
| Andy Ma                | Pharmacy resident – to conduct systematic review                       | <ul style="list-style-type: none"> <li>• Systematic review</li> <li>• Summary of findings</li> </ul>                                                     | None declared                                                                                                                                                                                                                                                                 |

## **Appendix 2. Systematic Review Methods and Results.**

### **Objectives**

We assessed the effects of deprescribing benzodiazepine receptor agonists (BZRAs) in adults with insomnia disorder.

### **Methods**

#### **Types of studies**

We included randomized control trials (RCTs) and quasi-randomized trials that meet the eligibility criteria below, as well as prospective cohort studies.

#### **Types of participants**

##### *Participant characteristics*

Participants must have been adults ( $\geq 18$  years of age) using BZRAs for at least one month. Investigators judged chronic use based on individual trials and author definitions. In addition, patients must be followed up for 6 months or more.

##### *Diagnosis*

Study participants suffered from insomnia disorder (primary insomnia) or co-morbid insomnia with other potential contributing co-morbidities adequately managed. The indication for the BZRA was insomnia, patients whose primary indication for BZRA for the treatment of diseases or conditions other than insomnia were not included.

##### *Co-morbidities*

Exclusion criteria included patients who suffered from an untreated co-morbid condition that may be causing or exacerbating insomnia, such as psychiatric diagnoses including anxiety and depression.

#### **Setting**

We did not apply restrictions on setting. If required, first authors were contacted for additional study data.

#### **Types of interventions**

Studies must have compared at least one of the deprescribing modalities with a comparison group. We will include studies which compare deprescribing to continued BZRA use (or usual care) as well as studies which compare different deprescribing modalities.

##### *Experimental Intervention*

For the purpose of this review, deprescribing was defined as one or more of the following interventions:

1. Abrupt discontinuation: abruptly stopping the BZRA.
2. Tapering: gradually reducing the dose until complete cessation of the BZRA.
3. CBT: cognitive behavioural therapy program for insomnia with the aim of stopping or reducing BZRA use in the process.
4. Combination: tapering and CBT used together.
5. Reduction in BZRA use, which includes the following sub-categories:
  - i) Using a lower dose of BZRA compared to baseline
  - ii) Using BZRA as needed
6. Substitutive therapy: discontinuing the BZRA and replacing with an alternative agent (e.g. melatonin) – either abruptly or through a cross-taper

#### *Comparator intervention*

1. Continued BZRA use
2. Usual Care
3. Other deprescribing interventions within the same study

All interventions could be as monotherapy or combined with other treatments. If treatment arms included concomitant interventions such as lifestyle and/or diet modifications, this did not affect inclusion in this review, as long as these additional interventions were handled similarly in all treatment arms. If studies included more than one treatment arm, this was also deemed acceptable, as long as at least one of the treatment arms met the pre-defined deprescribing intervention criteria.

#### **Types of outcome measures**

Studies that met the above inclusion criteria were included regardless of whether they report on the following outcomes.

#### **Primary outcomes**

Primary outcomes to be assessed include:

- 1) Subjective sleep quality. This can be measured by one or more of the following: Pittsburgh Sleep Quality Index (PSQI), Athens Insomnia Scale (AIS), Visual Analog Scale (VAS), Insomnia Severity Index (ISI), sleep diary, Spiegel Sleep Questionnaire, Simple Questionnaire.
- 2) Cessation rate: complete BZRA discontinuation after intervention and after x months (% of patients with zero BZRA consumption).

#### **Secondary outcomes**

- 1) Quality of life (measured using validated scale, e.g. 36-Item Short Form Health Survey36).
- 2) Effect on cognition (e.g. measured using Rey's 15-word test, VAS of alertness, cognitive assessment (spot the word, speed of comprehension, prose recall, map location, digit span), reaction time).

- 3) Effect on anxiety (e.g. measured using Spielberger State-Trait Anxiety Inventory (STAI), Beck Anxiety Inventory, Hamilton Anxiety Rating Scale (HAM)-A).
- 4) BZRA pill burden (average BZRA dose or tablet consumption/night (in equivalents), mean dose of BZRAs consumed at specific time points, frequency of BZRA use, defined daily dosage)
- 5) Adverse drug withdrawal events measured by: Tyrer's scale/Benzodiazepine Withdrawal Symptom Questionnaire (BWSQ), Ashton Withdrawal Symptom checklist, BZD Withdrawal Scale, Clinical Institute Withdrawal Assessment-BZDs (CIWA-B).
- 6) Harms (e.g. daytime sedation, balance, motor vehicle accidents, falls, mortality or dependence).
- 7) Daytime somnolence
- 8) Patient satisfaction

The above primary and secondary outcomes were assessed using any validated measurement such as Insomnia Severity Index (ISI) and State-Trait Anxiety Inventory (STAI) where appropriate.

### **Timing of outcome assessment**

We examined outcomes reported at 3 months of follow-up and 6 to 12 months of follow-up.

### **Search strategy**

We searched Medline, EMBASE and PsychINFO via OVID as well as the Cochrane library. Our search strategy for Medline is outlined below (will be adapted for other databases):

1. ((hypnotics and sedatives) or benzodiazepines).sh. or benzodiazepine\*.mp. or benzodiazepinone\*.mp. or alprazolam.mp. or Anthramycin.mp. or bromazepam.mp. or chlordiazepoxide.mp. or clonazepam.mp. or clorazepate.mp. or diazepam.mp. or Devazepide.mp. or eszopiclone.mp. or Estazolam.mp. or flumazenil.mp. or flunitrazepam.mp. or flurazepam.mp. or lorazepam.mp. or Medazepam.mp. or midazolam.mp. or nitrazepam.mp. or nordazepam.mp. or oxazepam.mp. or Pirenzepine.mp. or prazepam.mp. or temazepam.mp. or triazolam.mp. or zopiclone.mp. or zaleplon.mp. or zolpidem.mp. [mp=title, abstract, original title, name of substance word, subject heading word, keyword heading word, protocol supplementary concept word, rare disease supplementary concept word, unique identifier]
2. (ceas\* or cessation or decreas\* or deprescrib\* or de-prescrib\* or deprescription or de-prescription or discontinu\* or eliminat\* or reduc\* or stop\* or taper\* or substitut\* or withdraw\*).mp. [mp=title, abstract, original title, name of substance word, subject heading word, keyword heading word, protocol supplementary concept word, rare disease supplementary concept word, unique identifier]
3. (Sleep Initiation and Maintenance Disorders).sh. or INSOMNIA\*.mp. [mp=title, abstract, original title, name of substance word, subject heading word, keyword heading word, protocol supplementary concept word, rare disease supplementary concept word, unique identifier]
4. ACCIDENT\*.mp. or ACCIDENTS.sh. or Cognition.mp. or cognitive.mp. or COGNITION DISORDERS.sh. or DEPENDENC\*.mp. or FALL.mp. or FALLS.mp. or ACCIDENTAL FALLS.sh. or MORTALITY.mp. or SLEEP.mp. or SLEEP DISORDERS.sh. or substance withdrawal syndrome.sh. or withdraw\*.mp. or SUBSTANCE-RELATED DISORDERS.sh. or

ANXIETY.mp. or MOOD DISORDERS.sh. or MOOD.mp. or DEPRESSION.mp. or DEPRESSIVE.mp. or AFFECTIVE.mp. or BIPOLAR.mp. or (Drug-Related Side Effects and Adverse Reactions).sh. or (ADVERSE and DRUG\* and EFFECT\*).mp. [mp=title, abstract, original title, name of substance word, subject heading word, keyword heading word, protocol supplementary concept word, rare disease supplementary concept word, unique identifier]

5. 1 and 2 and 3 and 4

6. limit 5 to humans

We also included 23 studies identified from a scoping review we conducted on deprescribing of BZRAs for insomnia. That scoping review used the following search strategy in Pubmed:

1. deprescrib\* OR de-prescrib\* OR ceas\* OR withdraw\* OR stop\* OR cessation OR discontinu\* OR reduc\* OR taper\* OR eliminat\* OR decreas\* 2. benzodiazepine\* OR alprazolam OR bromazepam OR clonazepam OR diazepam OR flumazenil OR flunitrazepam OR flurazepam OR lorazepam OR nitrazepam OR oxazepam OR temazepam OR chlordiazepoxide OR midazolam OR triazolam OR clorazepate OR nordazepam OR prazepam OR zopiclone OR eszopiclone OR zaleplon OR zolpidem OR benzodiazepine [MeSH terms]

2. benzodiazepine\* OR alprazolam OR bromazepam OR clonazepam OR diazepam OR flumazenil OR flunitrazepam OR flurazepam OR lorazepam OR nitrazepam OR oxazepam OR temazepam OR chlordiazepoxide OR midazolam OR triazolam OR clorazepate OR nordazepam OR prazepam OR zopiclone OR eszopiclone OR zaleplon OR zolpidem OR benzodiazepine [MeSH terms]

3. elder\* OR older OR aged\* OR senior\* OR geriatr\* OR aged [MeSH terms] OR aged, 80 and over [MeSH terms] OR frail elderly [MeSH terms]

We checked the reference lists of all included studies, guidelines and relevant systematic reviews to identify any additional studies missed from the original electronic searches.

## **Data collection and analysis**

### *Selection of studies*

Three investigators independently reviewed search results, assessed study eligibility, trial quality and extracted data. Results at each stage were compared and cross-checked. Any disagreements were addressed by discussion with a fourth investigator. Reasons for exclusions were independently identified and recorded. We recorded the selection process in sufficient detail to complete a PRISMA flow diagram and 'Characteristics of excluded studies' table.

### *Data extraction and management*

A standardized study eligibility form and data collection form was developed. Prior to data collection, a pilot eligibility and data extraction exercise was completed involving the three independent reviewers to ensure criteria were consistently applied and to test the study eligibility and data collection form. During the data extraction process, an attempt was made to contact the primary author for clarification of missing data. We extracted PICOS and outcome data (listed above).

### *Main comparisons*

- 1) Deprescribing versus continuing BZRA versus any of the deprescribing intervention
- 2) Deprescribing versus usual care in managing patients on BZRA versus any of the deprescribing interventions
- 3) Deprescribing versus another different deprescribing intervention

All interventions could be either as monotherapy or as combined with other treatments.

### **Assessment of risk of bias**

Two review authors independently assessed risk of bias for each study using criteria outlined in the Cochrane Handbook for Systematic Reviews of Interventions. Any disagreements were resolved by discussion or by involving another review author. We assessed and documented supporting evidence of the following domains using The Cochrane Collaboration's tool for assessing risk of bias:

- 1) Random sequence generation
- 2) Allocation concealment
- 3) Blinding of participants and personnel
- 4) Blinding of outcome assessment
- 5) Incomplete outcome data
- 6) Selective outcome reporting
- 7) Other bias

Each domain was judged as high, low or unclear risk of bias and supporting quotes and rationale will be provided. We assessed and documented supporting evidence for the above domains using The Cochrane Collaboration's tool for assessing risk of bias [1]. We considered blinding separately for different key outcomes where necessary. When considering treatment effects, we took into account the risk of bias for the studies that contributed to that outcome.

### **Measures of treatment effect**

Data analysis was conducted using RevMAN v.5.3. For randomized controlled trials with dichotomous outcomes, the total number of participants and outcome events and in treatment and control groups was collected. For randomized controlled trials with continuous outcomes, the number of participants in each treatment arm, as well as the mean value and standard deviation for each outcome was collected. Relative risk (RR) and a 95% confidence intervals (CI) were reported for dichotomous outcome data. Continuous outcomes were synthesized using weighted mean differences (MD) together with 95% (CI), if all outcomes were measured on the same scale. When possible, intention-to-treat (ITT) results was used. If ITT data was not available for continuous outcomes, we used available case analysis. If ITT data was not available for a dichotomous outcome, we assumed participants in both arms did not experience the event.

### **Dealing with missing data**

We contacted investigators or study sponsors in order to verify key study characteristics and obtain missing numerical outcome data where possible.

### **Missing Statistics**

We will not impute data. When only the standard error or t-test or P values are reported, we will calculate SDs. We will not impute SDs from similar studies.

### **Assessment of heterogeneity**

We investigated heterogeneity by checking the  $I^2$  statistic. We used Cochrane Handbook for Systematic Reviews of Interventions's rough guide to its interpretation as follows: 0% to 40% might not be important; 30% to 60% may represent moderate heterogeneity; 50% to 90% may represent substantial heterogeneity; and 75% to 100% considerable heterogeneity [1]. We also considered that the importance of the observed value of  $I^2$  depends on (i) the magnitude and direction of effects and (ii) the strength of evidence for heterogeneity (for example P value from the Chi square test, or a CI for  $I^2$ ).

### **Data synthesis**

If studies were judged to be homogeneous in terms of study design, study population, intervention and outcome reporting, we meta-analyzed these studies. If only a portion of studies were homogeneous, we only pooled those studies. If studies were judged overly heterogeneous based on the factors described above, and meta-analysis was considered inappropriate, a narrative summary was undertaken. We used a random-effects meta-analysis model with inverse variance weighting.

### **Subgroup analysis and investigation of heterogeneity**

We intended to conduct subgroup analyses if possible. We planned to analyze separately by class of BZRA (benzodiazepines and non-benzodiazepines) and also: trial setting (primary versus long-term care or hospital) and age (young adult [18-64 years of age] vs older adults [>64 years of age]).

### **Summary of findings table**

We used the GRADE approach to assess the quality of the body of evidence as described in The Cochrane Handbook for Systematic Reviews of Interventions [1]. We created Summary of Findings (SOF) tables to summarise the key findings of the review. We created SOF for patient-important outcomes, including:

1. Subjective sleep quality and sleep outcomes
2. Cessation rate
3. BZRA withdrawal events
4. Changes in anxiety
5. Changes in cognition



## Results

A total of 2399 studies were identified from the primary electronic databases and 23 from other sources. Of these, 411 were identified as duplicates, leaving 2011 abstracts and titles identified as original publications. Thirteen of these studies met our eligibility criteria and were included in the review. Figure 1 summarizes the flow of studies.

Figure 1. PRISMA flow diagram.

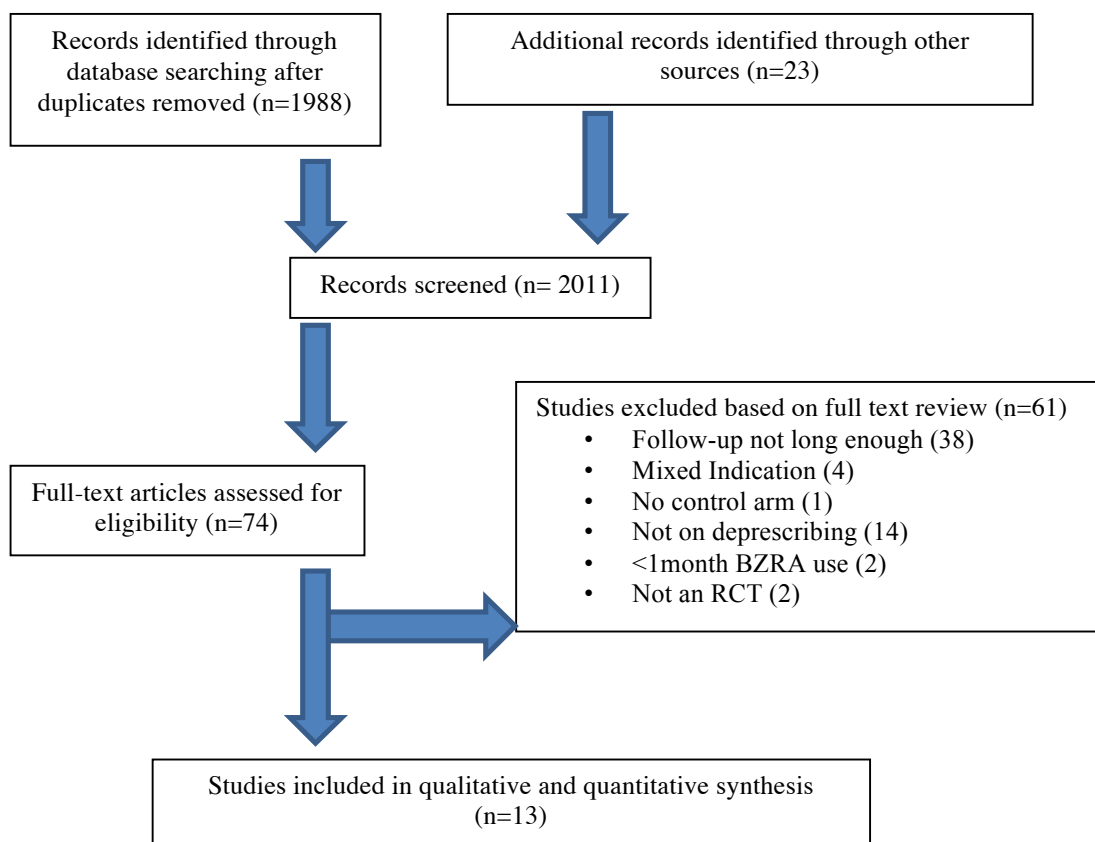

### Characteristics of included studies

*Baillargeon 2003 [2]*

|                     |                                                                                                                                        |
|---------------------|----------------------------------------------------------------------------------------------------------------------------------------|
| <b>Methods</b>      | Randomized trial                                                                                                                       |
| <b>Participants</b> | n=65, aged 50 years of age or older (mean age 67), daily benzodiazepine (BZD) use at bedtime for >3 months (mean duration 152 months), |

|                      |                                                                                                                                                                                                                                              |
|----------------------|----------------------------------------------------------------------------------------------------------------------------------------------------------------------------------------------------------------------------------------------|
|                      | diagnosis of chronic insomnia (excluded if psychological problems related to insomnia or taking BZD during day)                                                                                                                              |
| <b>Interventions</b> | Cognitive-behavioural therapy (CBT – eight 90 minute sessions in groups of 5-7) and gradual tapering of BZD (25% of dose every 1-2 weeks for 8 weeks) vs. gradual tapering of BZD alone                                                      |
| <b>Outcomes</b>      | Cessation rate (benzodiazepine free)                                                                                                                                                                                                         |
| <b>Notes</b>         | No major adverse reactions during tapering                                                                                                                                                                                                   |
| <b>Risk of bias</b>  | Random sequence generation: low<br>Allocation concealment: high<br>Blinding of participants and personnel: high<br>Blinding of outcome assessment: high<br>Incomplete outcome data: high<br>Selective reporting: high<br>Other bias: unclear |

*Belleville 2007 [3]*

|                      |                                                                                                                                                                                                                                                                                                            |
|----------------------|------------------------------------------------------------------------------------------------------------------------------------------------------------------------------------------------------------------------------------------------------------------------------------------------------------|
| <b>Methods</b>       | Randomized trial                                                                                                                                                                                                                                                                                           |
| <b>Participants</b>  | n=53, aged 18 years of age or older, use of a medication to promote sleep (BZRA) more than 3 nights per week for at least 3 months, current or past difficulty initiating or maintaining sleep and daytime impairment (excluded if presence of medical or psychological disorder related to sleep problem) |
| <b>Interventions</b> | Self-help CBT (5 booklets, 1 booklet per week for 5 weeks) plus BZRA tapering intervention (25% every 2 weeks until lowest dose, then drug-free days) vs. tapering intervention alone                                                                                                                      |
| <b>Outcomes</b>      | Cessation rate, CIWA-B, SF-36, sleep onset latency, STAI, sleep efficiency, total sleep time                                                                                                                                                                                                               |
| <b>Notes</b>         | Significantly higher drop-out in CBT plus taper group (procedure too hard to follow)                                                                                                                                                                                                                       |
| <b>Risk of bias</b>  | Random sequence generation: low<br>Allocation concealment: high<br>Blinding of participants and personnel: unclear<br>Blinding of outcome assessment: unclear<br>Incomplete outcome data: high<br>Selective reporting: low<br>Other bias: unclear                                                          |

*Belleville 2008 [4]*

|                      |                                                                                                                                         |
|----------------------|-----------------------------------------------------------------------------------------------------------------------------------------|
| <b>Methods</b>       | See Belleville 2007                                                                                                                     |
| <b>Participants</b>  | See Belleville 2007                                                                                                                     |
| <b>Interventions</b> | See Belleville 2007                                                                                                                     |
| <b>Outcomes</b>      | Secondary analysis of Belleville 2007 to compare participants who achieved and maintained BZRA-free status (explore effect of insomnia) |

|                     |                                                                                                                                                                                                                                                       |
|---------------------|-------------------------------------------------------------------------------------------------------------------------------------------------------------------------------------------------------------------------------------------------------|
|                     | severity, withdrawal symptoms, health, readiness to change on cessation rate)                                                                                                                                                                         |
| <b>Notes</b>        | Post-hoc secondary analysis                                                                                                                                                                                                                           |
| <b>Risk of bias</b> | Random sequence generation: low<br>Allocation concealment: high<br>Blinding of participants and personnel: unclear<br>Blinding of outcome assessment: unclear<br>Incomplete outcome data: unclear<br>Selective reporting: high<br>Other bias: unclear |

*Curran 2003* [5]

|                      |                                                                                                                                                                                                                                                                                              |
|----------------------|----------------------------------------------------------------------------------------------------------------------------------------------------------------------------------------------------------------------------------------------------------------------------------------------|
| <b>Methods</b>       | Randomized double-blind trial (and non-randomized continuation arm)                                                                                                                                                                                                                          |
| <b>Participants</b>  | n=104 randomized to immediate (group A) or delayed tapering at 12 weeks (group B)<br>n=34 chose to continue BZD (group C)<br>Aged 65 years of age or older (mean age 77 years of age), taking BZD as a hypnotic daily for at least 6 months (excluded if current major psychiatric disorder) |
| <b>Interventions</b> | Tapering (25% of dose every 2 weeks) vs. continuation (12 weeks, randomized – group A vs. group B)<br>Tapering vs. continuation (52 weeks, non-randomized – group A vs. group C)                                                                                                             |
| <b>Outcomes</b>      | Cessation rate, problems sleeping, BWSQ, cognition, anxiety                                                                                                                                                                                                                                  |
| <b>Notes</b>         | 52 week results treated as prospective cohort study                                                                                                                                                                                                                                          |
| <b>Risk of bias</b>  | Random sequence generation: unclear<br>Allocation concealment: unclear<br>Blinding of participants and personnel: low<br>Blinding of outcome assessment: low<br>Incomplete outcome data: low<br>Selective reporting: low<br>Other bias: unclear                                              |

*Garfinkel 1999* [6]

|                      |                                                                                                                                            |
|----------------------|--------------------------------------------------------------------------------------------------------------------------------------------|
| <b>Methods</b>       | Randomized double-blind placebo controlled trial                                                                                           |
| <b>Participants</b>  | n=34, mean age 68 years of age taking BZD for at least 6 months for sleep                                                                  |
| <b>Interventions</b> | Gradual tapering of BZD (50% for 2 weeks, then 25% every 2 weeks) plus melatonin controlled-release 2 mg vs. gradual tapering plus placebo |
| <b>Outcomes</b>      | Cessation rate                                                                                                                             |
| <b>Notes</b>         | None                                                                                                                                       |
| <b>Risk of bias</b>  | Random sequence generation: unclear                                                                                                        |

|  |                                                                                                                                                                                                               |
|--|---------------------------------------------------------------------------------------------------------------------------------------------------------------------------------------------------------------|
|  | Allocation concealment: unclear<br>Blinding of participants and personnel: unclear<br>Blinding of outcome assessment: high<br>Incomplete outcome data: low<br>Selective reporting: low<br>Other bias: unclear |
|--|---------------------------------------------------------------------------------------------------------------------------------------------------------------------------------------------------------------|

*Habraken 1997*[7]

|                      |                                                                                                                                                                                                                                                           |
|----------------------|-----------------------------------------------------------------------------------------------------------------------------------------------------------------------------------------------------------------------------------------------------------|
| <b>Methods</b>       | Randomized double-blind controlled trial                                                                                                                                                                                                                  |
| <b>Participants</b>  | n=55, aged 65 years of age or older, using BZDs for at least 1 year (once daily use for at least 1 month before trial), excluded if psychological disorder or serious medical disease                                                                     |
| <b>Interventions</b> | Tapering (25% per week for 3 weeks, then 12.5% per week) vs. continuation of BZD                                                                                                                                                                          |
| <b>Outcomes</b>      | BWSQ, sleep quality, geriatrics observation scale                                                                                                                                                                                                         |
| <b>Notes</b>         | Incomplete outcome data, and no useable outcome data at 12 weeks or 52 weeks                                                                                                                                                                              |
| <b>Risk of bias</b>  | Random sequence generation: unclear<br>Allocation concealment: unclear<br>Blinding of participants and personnel: unclear<br>Blinding of outcome assessment: unclear<br>Incomplete outcome data: high<br>Selective reporting: high<br>Other bias: unclear |

*Morin 2004* [8]

|                      |                                                                                                                                                                                                                                                   |
|----------------------|---------------------------------------------------------------------------------------------------------------------------------------------------------------------------------------------------------------------------------------------------|
| <b>Methods</b>       | Randomised trial                                                                                                                                                                                                                                  |
| <b>Participants</b>  | n=76, aged 55 years of age or older (mean age 62.5), BZD >50% of nights for at least 3 months (excluded if insomnia was directly related to a medical or psychiatric disorder)                                                                    |
| <b>Interventions</b> | CBT (90 minute group sessions) vs. taper alone (25% reduction every 2 weeks) vs. CBT plus taper                                                                                                                                                   |
| <b>Outcomes</b>      | Sleep efficiency, total sleep time, total wake time, sleep onset latency, wake after sleep onset, insomnia severity index (ISI), cessation rate                                                                                                   |
| <b>Notes</b>         | None                                                                                                                                                                                                                                              |
| <b>Risk of bias</b>  | Random sequence generation: unclear<br>Allocation concealment: unclear<br>Blinding of participants and personnel: high<br>Blinding of outcome assessment: high<br>Incomplete outcome data: low<br>Selective reporting: low<br>Other bias: unclear |

*Morin 2005*[9]

|                      |                                                                                                                                                                                                                                                     |
|----------------------|-----------------------------------------------------------------------------------------------------------------------------------------------------------------------------------------------------------------------------------------------------|
| <b>Methods</b>       | See Morin 2004 (survival analysis of Morin 2004 at 2 years)                                                                                                                                                                                         |
| <b>Participants</b>  | See Morin 2004 (analyzed n=47 who successfully discontinued BZD use from Morin 2004, n=13 CBT, n=13 taper alone, n=21 CBT plus taper)                                                                                                               |
| <b>Interventions</b> | See Morin 2004                                                                                                                                                                                                                                      |
| <b>Outcomes</b>      | Sustained cessation (and predictors of sustained cessation, insomnia severity, anxiety inventory, attitudes about sleep, brief symptom inventory)                                                                                                   |
| <b>Notes</b>         | Post-hoc and exploratory analysis of Morin 2004                                                                                                                                                                                                     |
| <b>Risk of bias</b>  | Random sequence generation: unclear<br>Allocation concealment: unclear<br>Blinding of participants and personnel: high<br>Blinding of outcome assessment: high<br>Incomplete outcome data: high<br>Selective reporting: high<br>Other bias: unclear |

*Oude Voshaar 2003*[10]

|                      |                                                                                                                                                                                                                                               |
|----------------------|-----------------------------------------------------------------------------------------------------------------------------------------------------------------------------------------------------------------------------------------------|
| <b>Methods</b>       | Randomized trial                                                                                                                                                                                                                              |
| <b>Participants</b>  | n=180, mean age ~63 years of age, using BZDs for at least 3 months (excluded if current psychiatric treatment)                                                                                                                                |
| <b>Interventions</b> | CBT (five 2 hour group sessions) plus tapering (25% per week for 4 weeks, then 12.5% every 4 days) vs. tapering alone vs. usual care                                                                                                          |
| <b>Outcomes</b>      | Cessation rate, BWSQ, delayed recall, mood state score, GHQ-12                                                                                                                                                                                |
| <b>Notes</b>         | None                                                                                                                                                                                                                                          |
| <b>Risk of bias</b>  | Random sequence generation: low<br>Allocation concealment: unclear<br>Blinding of participants and personnel: high<br>Blinding of outcome assessment: high<br>Incomplete outcome data: low<br>Selective reporting: low<br>Other bias: unclear |

*Oude Voshaar 2006*[11]

|                      |                                                                  |
|----------------------|------------------------------------------------------------------|
| <b>Methods</b>       | See Oude Voshaar 2003                                            |
| <b>Participants</b>  | See Oude Voshaar 2003                                            |
| <b>Interventions</b> | See Oude Voshaar 2003                                            |
| <b>Outcomes</b>      | Cessation rate at 15 months (measured via prescription database) |

|                     |                                                                                                                                                                                                                                             |
|---------------------|---------------------------------------------------------------------------------------------------------------------------------------------------------------------------------------------------------------------------------------------|
| <b>Notes</b>        | Long-term follow-up data from Oude Voshaar 2003                                                                                                                                                                                             |
| <b>Risk of bias</b> | Random sequence generation: low<br>Allocation concealment: unclear<br>Blinding of participants and personnel: low<br>Blinding of outcome assessment: low<br>Incomplete outcome data: low<br>Selective reporting: low<br>Other bias: unclear |

*Pat-Horenyk 1998*[12]

|                      |                                                                                                                                                                                                                                                              |
|----------------------|--------------------------------------------------------------------------------------------------------------------------------------------------------------------------------------------------------------------------------------------------------------|
| <b>Methods</b>       | Randomized double-blind controlled trial                                                                                                                                                                                                                     |
| <b>Participants</b>  | n=24, mean 49 years of age, history of BZD-dependent insomnia with no other psychiatric diagnosis, us of BZD for at least 3 months                                                                                                                           |
| <b>Interventions</b> | Tapering of flurazepam (50% reduction weekly) vs. switch to zopiclone 7.5mg nightly and tapering of zopiclone (50% reduction weekly)                                                                                                                         |
| <b>Outcomes</b>      | Data at 5 weeks: sleep latency, REM latency, total bed time, total sleep time, sleep efficiency; sleep diary reports of: total sleep time, sleep latency, sleep quality, number of awakenings, morning feeling; cessation rate at 3 months                   |
| <b>Notes</b>         | Did not report data at 3 months and 12 months                                                                                                                                                                                                                |
| <b>Risk of bias</b>  | Random sequence generation: unclear<br>Allocation concealment: unclear<br>Blinding of participants and personnel: unclear<br>Blinding of outcome assessment: unclear<br>Incomplete outcome data: unclear<br>Selective reporting: high<br>Other bias: unclear |

*Shapiro 1995*[13]

|                      |                                                                                                                                                                                                                                                                                                                                                                  |
|----------------------|------------------------------------------------------------------------------------------------------------------------------------------------------------------------------------------------------------------------------------------------------------------------------------------------------------------------------------------------------------------|
| <b>Methods</b>       | Randomized trial                                                                                                                                                                                                                                                                                                                                                 |
| <b>Participants</b>  | n=134, mean 50 years of age, taking BZD for at least 3 months as a hypnotic                                                                                                                                                                                                                                                                                      |
| <b>Interventions</b> | 1) stop previous hypnotic for 3 days, start zopiclone<br>2) stop previous hypnotic and switch immediately to zopiclone<br>3) take original hypnotic and take zopiclone together with original hypnotic for 3 to 8 days, then use zopiclone alone<br>All patients took zopiclone for 21 to 30 days, no information on how it was withdrawn at end of study period |
| <b>Outcomes</b>      | Analyses were performed on responses to 3 questions via telephone or a 21 day sleep diary:<br>1) How alert were you today?<br>2) How well did you sleep last night?                                                                                                                                                                                              |

|                     |                                                                                                                                                                                                                                                              |
|---------------------|--------------------------------------------------------------------------------------------------------------------------------------------------------------------------------------------------------------------------------------------------------------|
|                     | 3) How are you feeling generally?<br>Adverse effects                                                                                                                                                                                                         |
| <b>Notes</b>        | Collected data at 12 to 18 months but not reported                                                                                                                                                                                                           |
| <b>Risk of bias</b> | Random sequence generation: unclear<br>Allocation concealment: unclear<br>Blinding of participants and personnel: unclear<br>Blinding of outcome assessment: unclear<br>Incomplete outcome data: unclear<br>Selective reporting: high<br>Other bias: unclear |

*Visser 2007*[14]

|                      |                                                                                                                                                                                                                                                    |
|----------------------|----------------------------------------------------------------------------------------------------------------------------------------------------------------------------------------------------------------------------------------------------|
| <b>Methods</b>       | Randomized placebo controlled trial                                                                                                                                                                                                                |
| <b>Participants</b>  | n=38, 76% 60 years of age or older, using BZD as a sleeping pill for at least 3 days per week for more than 3 months                                                                                                                               |
| <b>Interventions</b> | Tapering of BZD (switch to diazepam and reduce by 25% every 2 weeks, and 12.5% every 2 weeks for last 4 weeks) plus melatonin 5mg 4 hours before bed vs. tapering alone                                                                            |
| <b>Outcomes</b>      | Cessation rate                                                                                                                                                                                                                                     |
| <b>Notes</b>         | None                                                                                                                                                                                                                                               |
| <b>Risk of bias</b>  | Random sequence generation: unclear<br>Allocation concealment: unclear<br>Blinding of participants and personnel: high<br>Blinding of outcome assessment: high<br>Incomplete outcome data: low<br>Selective reporting: high<br>Other bias: unclear |

### Excluded studies (n=61)

| <b>Study</b>       | <b>Reason</b>                        |
|--------------------|--------------------------------------|
| Bixler 1985        | Duration of BZRA use not long enough |
| Pollack 2008       | Follow-up not long enough            |
| O'Connor 2008      | Mixed indication                     |
| O'Connor 1999      | Not randomized controlled trial      |
| Pagot 1993         | Mixed indication                     |
| Ancoli-Israel 2010 | Follow-up not long enough            |
| Ancoli-Israel 2005 | Follow-up not long enough            |
| Asnis 1999         | Follow-up not long enough            |
| Belanger 2005      | Follow-up not long enough            |
| Busto 1998         | Follow-up not long enough            |

|                   |                                      |
|-------------------|--------------------------------------|
| Elie 1990         | Follow-up not long enough            |
| Erman 2008        | Follow-up not long enough            |
| Fry 2000          | Follow-up not long enough            |
| Hajak 1999        | Follow-up not long enough            |
| Hajak 1998        | Follow-up not long enough            |
| Johnson 1983      | Follow-up not long enough            |
| Kleykamp 2012     | Follow-up not long enough            |
| Lemoine 1997      | Follow-up not long enough            |
| Poyares 2002      | Follow-up not long enough            |
| Tham 1989         | Follow-up not long enough            |
| Voderholzer 2001  | Follow-up not long enough            |
| Walsh 2000        | Follow-up not long enough            |
| Ware 1997         | Follow-up not long enough            |
| Zammit 2004       | Follow-up not long enough            |
| Krystal 2008      | Follow-up not long enough            |
| Walsh 2007        | Follow-up not long enough            |
| Cardinali 2002    | Follow-up not long enough            |
| Leppik 1997       | Follow-up not long enough            |
| Roth 2009         | Follow-up not long enough            |
| Allen 1987        | Follow-up not long enough            |
| Scharf 1994       | Follow-up not long enough            |
| Oude-Voshaar 2004 | Follow-up not long enough            |
| Omvik 2008        | Not deprescribing                    |
| Vallieres 2004    | No control group                     |
| Roehrs 2011       | Not deprescribing                    |
| Siversten 2006    | Not deprescribing                    |
| Roth 2005         | Not deprescribing                    |
| Randall 2012      | Not deprescribing                    |
| Houlenger 1984    | Duration of BZRA use not long enough |
| Maarek 1992       | Not randomized controlled trial      |
| Morin 2002        | Not deprescribing                    |
| Morin 2009        | Not deprescribing                    |
| Scharf 2007       | Follow-up not long enough            |
| Lichstein 2013    | Mixed indication                     |
| Oswald 1982       | Follow-up not long enough            |
| Reeves 1977       | Not deprescribing                    |
| Bayer 1986        | Follow-up not long enough            |
| Taylor 2010       | Not deprescribing                    |
| Lahteenmaki 2014  | Follow-up not long enough            |
| Voderholzer 1997  | Follow-up not long enough            |
| Salinas 1998      | Follow-up not long enough            |
| Hajak 1997        | Follow-up not long enough            |
| Hajak 1995        | Follow-up not long enough            |
| Garfinkel 1997    | Not deprescribing                    |
| Lahmeyer 1997     | Follow-up not long enough            |



|              |                           |
|--------------|---------------------------|
| Lemoine 1995 | Follow-up not long enough |
| Vicens 2014  | Mixed indication          |
| Jacobs 2004  | Not deprescribing         |
| Wu 2006      | Not deprescribing         |
| Morgan 2003  | Not deprescribing         |
| Morin 1998   | Not deprescribing         |

## References to excluded studies

1. Bixler E, Kales J, Kales A, Jacoby J, Soldatos C. Rebound Insomnia and Elimination Half-Life: Assessment of Individual Subject Response. *The Journal of Clinical Pharmacology*. 1985;25(2):115-124.
2. Pollack M, Kinrys G, Krystal A, McCall W, Roth T, Schaefer K et al. Eszopiclone Coadministered With Escitalopram in Patients With Insomnia and Comorbid Generalized Anxiety Disorder. *Arch Gen Psychiatry*. 2008;65(5):551.
3. O'Connor K, Marchand A, Brousseau L, Aardema F, Mainguy N, Landry P et al. Cognitive-behavioural, pharmacological and psychosocial predictors of outcome during tapered discontinuation of benzodiazepine. *Clinical Psychology & Psychotherapy*. 2008;15(1):1-14.
4. O'Connor K, Bélanger L, Marchand A, Dupuis G, Elie R, Boyer R. Psychological distress and adaptational problems associated with discontinuation of benzodiazepines. *Addictive Behaviors*. 1999;24(4):537-541.
5. Pagot R, Cramer P, L'Heritier C, Coquelin J, Attali P. Comparison of the efficacy and tolerability of zolpidem 20 mg and triazolam 0.5 mg in anxious or depressed insomniac patients. *Current Therapeutic Research*. 1993;53(1):88-97.
6. Ancoli-Israel S, Krystal A, McCall V, Schaefer K, Wilson A, Claus R, Rubens R. A 12-week, randomized, double-blind, placebo-controlled study evaluating the effect of eszopiclone 2 mg on sleep/wake function in older adults with primary and comorbid insomnia. *Sleep* 2010; 33(2): 225-234
7. Ancoli-Israel S, Richardson G, Mangano R, Jenkins L, Hall P, Jones W. Long-term use of sedative hypnotics in older patients with insomnia. *Sleep Medicine*. 2005;6(2):107-113.
8. Asnis G, Chakraborty A, DuBoff E, Krystal A, Londeborg P, Rosenberg R et al. Zolpidem for Persistent Insomnia in SSRI-Treated Depressed Patients. *J Clin Psychiatry*. 1999;60(10):668-676.
9. Bélanger L, Morin C, Bastien C, Ladouceur R. Self-Efficacy and Compliance With Benzodiazepine Taper in Older Adults With Chronic Insomnia. *Health Psychology*. 2005;24(3):281-287.
10. Busto, E, Naranjo C, Bremner K, Peachey J, Bologa M. Safety of ipsapirone treatment compared with lorazepam: discontinuation effects. *Journal of Psychiatry Neuroscience*. 1998; 23(1): 35-44
11. Elie R, Lavoie G, Bourgouin J, Morvan P. Zopiclone versus Flurazepam in Insomnia. *International Clinical Psychopharmacology*. 1990;5(4):279-286.
12. Erman M, Guiraud A, Joish V, Lerner D. Zolpidem extended-release 12.5 mg associated with improvements in work performance in a 6-month randomized, placebo-controlled trial. *Sleep* 2008; 31(10): 1371-1378
13. Fry J, Scharf M, Mangano R, Fujimori M. Zaleplon improves sleep without producing rebound effects in outpatients with insomnia. *International Clinical Psychopharmacology*. 2000;15(3):141-152.
14. Hajak G, Clarenbach P, Fischer W, Haase W, Rüter E. Zopiclone improves sleep quality and daytime well-being in insomniac patients. *International Clinical Psychopharmacology*. 1994;9(4):251-262.
15. Hajak G, Clarenbach P, Fischer W, Rodenbeck A, Bandelow B, Broocks A et al. Rebound insomnia after hypnotic withdrawal in insomniac outpatients. *European Archives of Psychiatry and Clinical Neuroscience*. 1998;248(3):148-156.
16. Johnson L, Spinweber C, Seidel W, Dement W. Sleep spindle and delta changes during chronic use of a short-acting and a long-acting benzodiazepine hypnotic. *Electroencephalography and Clinical Neurophysiology*. 1983;55(6):662-667.

17. Kleykamp B, Griffiths R, McCann U, Smith M, Mintzer M. Acute effects of zolpidem extended-release on cognitive performance and sleep in healthy males after repeated nightly use. *Experimental and Clinical Psychopharmacology*. 2012;20(1):28-39.
18. Lemoine P, Ohayon M. Is hypnotic withdrawal facilitated by the transitory use of a substitute drug? *Prog. Neuro-Psychopharmacol & Biol. Psychiat*, 1997. 21: 111-124
19. Poyares D, Guilleminault C, Ohayon M, Tufik S. Can valerian improve the sleep of insomniacs after benzodiazepine withdrawal?. *Progress in Neuro-Psychopharmacology and Biological Psychiatry*. 2002;26(3):539-545.
20. Tham T, Brown H, McA Taggart H. Temazepam withdrawal in elderly hospitalized patients: a double blind randomised trial comparing abrupt versus gradual withdrawal. *Irish Journal of Medical Science*. 1989;158(11):294-296.
21. Voderholzer U, Riemann D, Hornyak M, Backhaus J, Feige B, Berger M et al. A double-blind, randomized and placebo-controlled study on the polysomnographic withdrawal effects of zopiclone, zolpidem and triazolam in healthy subjects. *European Archives of Psychiatry and Clinical Neurosciences*. 2001;251(3):117-123.
22. Walsh k, Roth T, Randazzo A, Erman M, Jamieson A, Scharf M, Schweitzer P, Ware J. Eight weeks of non-nightly use of zolpidem for primary insomnia. *Sleep*. 2000; 23(8): 1-10
23. Ware J, Walsh J, Scharf M, Roehrs T, Roth T, Vogel G. Minimal Rebound Insomnia After Treatment with 10-mg Zolpidem. *Clinical Neuropharmacology*. 1997;20(2):116-125.
24. Zammit G, McNabb L, Caron J, Amato D, Roth T. Efficacy and safety of eszopiclone across 6-weeks of treatment for primary insomnia. *Current Medical Research and Opinion*. 2004;20(12):1979-1991.
25. Krystal A, Erman M, Zammit G, Soubrane C, Roth T. Long-term efficacy and safety of zolpidem extended-release 12.5 mg, administered 3 to 7 nights per week for 24 weeks, in patients with chronic primary insomnia: a 6-month, randomized, double-blind, placebo-controlled, parallel-group, multicenter study. *Sleep* 2008; 31(1): 79-90
26. Walsh K, Krystal A, Amato D, Rubens R, Caron J, Wessel T, Schaefer K, Roach J, Wallenstein G, Roth T. Nightly treatment of primary insomnia with eszopiclone for six months: effect on sleep, quality of life, and work limitations. *Sleep* 2007; 30(8): 959-968
27. Cardinali D, Gvozdzenovich E, Kaplan M, Fainstein I, Shifis H, Lloret S, Albornoz L, Negri A. A double blind-placebo controlled study on melatonin efficacy to reduce anxiolytic benzodiazepine use in the elderly. *Neuroendocrinology Letters*. 2002; 23: 55-60
28. Leppik IE, Roth-Schechter B, Gray W, Cohn M, Owens D. Double-blind, placebo-controlled comparison of zolpidem, triazolam, and temazepam in elderly patients with insomnia. *Drug Development Research*. 1997;40:230-238
29. Roth T, Price J, Amato D, Rubens R, Roach J, Schnitzer T. The Effect of Eszopiclone in Patients With Insomnia and Coexisting Rheumatoid Arthritis. *Prim Care Companion J Clin Psychiatry*. 2009;11(6):292-301.
30. Allen R, Mendels J, Nevins D, Chernik D, Hoddes E. Efficacy Without Tolerance or Rebound Insomnia for Midazolam and Temazepam After Use for One to Three Months. *The Journal of Clinical Pharmacology*. 1987;27(10):768-775.
31. Scharf M, Mendels J, Thorpy M, Weiss B. Safety of long-term zolpidem treatment in patients with insomnia. *Current Therapeutic Research*. 1994;55(9):1100-1111.
32. Voshaar R, van Balkom A, Zitman F. Zolpidem is not superior to temazepam with respect to rebound insomnia: a controlled study. *European Neuropsychopharmacology*. 2004;14(4):301-306.
33. Omvik S, Sivertsen B, Pallesen S, Bjorvatn B, Havik O, Nordhus I. Daytime functioning in older patients suffering from chronic insomnia: Treatment outcome in a randomized controlled trial comparing CBT with Zopiclone. *Behaviour Research and Therapy*. 2008;46(5):623-641.
34. Vallieres A, Morin C, Guay B, Bastien C, LeBlanc M. Sequential Treatment for Chronic Insomnia: A Pilot Study. *Behavioral Sleep Medicine*. 2004;2(2):94-112.
35. Roehrs T, Randall S, Harris E, Maan R, Roth T. Twelve months of nightly zolpidem does not lead to rebound insomnia or withdrawal symptoms: a prospective placebo-controlled study. *Journal of Psychopharmacology*. 2011;26(8):1088-1095.

36. Sivertsen B, Omvik S, Pallesen S, Bjorvatn B, Havik O, Kvale G et al. Cognitive Behavioral Therapy vs Zopiclone for Treatment of Chronic Primary Insomnia in Older Adults. *JAMA*. 2006;295(24):2851
37. Roth T, Walsh J, Krystal A, Wessell T, Roehrs T. An evaluation of the efficacy and safety of eszopiclone over 12 months in patients with chronic primary insomnia. *Sleep Medicine*. 2005;6(6):487-495.
38. Randall S, Roehrs T, Roth T. Efficacy of Eight Months of Nightly Zolpidem: A Prospective Placebo-Controlled Study. *SLEEP*. 2012;.
39. Houlienger J, Smokcum R, Lader M. Rate of Increase of Plasma Lorazepam Concentrations; Absence of Influence upon Subjective and Objective Effects. *Journal of Clinical Psychopharmacology*. 1984;4(1):25-31.
40. Maarek L, Cramer P, Attali P, Coquelin J, Morselli P. The safety and efficacy of zolpidem in insomniac patients: a long-term open study in general practice. *Journal of International Medical Research*. 1992; 20: 162-170
41. Morin C, Blais F, Savard J. Are changes in beliefs and attitudes about sleep related to sleep improvements in the treatment of insomnia?. *Behaviour Research and Therapy*. 2002;40(7):741-752.
42. Morin C, Vallières A, Guay B, Ivers H, Savard J, Mérette C et al. Cognitive Behavioral Therapy, Singly and Combined With Medication, for Persistent Insomnia. *JAMA*. 2009;301(19):2005.
43. Scharf M, Black J, Hull S, Landin R, Farber R. Long-term nightly treatment with indiplon in adults with primary insomnia results of a double-blind, placebo-controlled, 3 month study. *Sleep*. 2007; 30 (6): 743-752
44. Lichstein K, Nau S, Wilson N, Aguillard R, Lester K, Bush A et al. Psychological treatment of hypnotic-dependent insomnia in a primarily older adult sample. *Behaviour Research and Therapy*. 2013;51(12):787-796.
45. Oswald I, French C, Adam K, Gilham J. Benzodiazepine hypnotics remain effective for 24 weeks. *BMJ*. 1982;284(6319):860-863.
46. Reeves R. Comparison of Triazolam, Flurazepam, and Placebo as Hypnotics in Geriatric Patients with Insomnia. *The Journal of Clinical Pharmacology*. 1977;17(5-6):319-323.
47. Bayer A, Bayer E, Pathy M, Stoker M. A double-blind controlled study of chlormethiazole and triazolam as hypnotics in the elderly. *Acta Psychiatrica Scandinavica*. 1986;73(s329):104-111.
48. Taylor D, Schmidt-Nowara W, Jessop C, Ahearn J. Sleep restriction therapy and hypnotic withdrawal versus sleep hygiene education and hypnotic using patients with insomnia. *Journal of Clinical Sleep Medicine*. 2010; 6(2); 169-175
49. Lähteenmäki R, Puustinen J, Vahlberg T, Lyles A, Neuvonen P, Partinen M et al. Melatonin for sedative withdrawal in older patients with primary insomnia: a randomized double-blind placebo-controlled trial. *British Journal of Clinical Pharmacology*. 2014;77(6):975-985.
50. Voderholzer U, Riemann D, Hornyak M, Hohagen F, Berger M. Polysomnographic withdrawal effects after zopiclone, zolpidem, triazolam and placebo treatment in healthy subjects. *Biological Psychiatry*. 1997;42(1):69S.
51. Salinas EG. Zaleplon decreases sleep latency in outpatients after 4 weeks of treatment. *European Neuropsychopharmacology*. 1998;8:S297.
52. Hajak G, Clarenbach P, Fischer W, Rodenbeck A, Bandelow B, Rüther E. P.6.021 Rebound insomnia after abrupt hypnotic withdrawal. *European Neuropsychopharmacology*. 1997;7:S271.
53. Hajak G, Clarenbach P, Fischer W, Haase W, Bandelow B, Adler L et al. Effects of hypnotics on sleep quality and daytime well-being. Data from a comparative multicentre study in outpatients with insomnia. *European Psychiatry*. 1995;10:173s-179s.
54. Garfinkel D, Laudon M, Zisapel N. Improvement of sleep quality by controlled-release melatonin in benzodiazepine-treated elderly insomniacs. *Archives of Gerontology and Geriatrics*. 1997;24(2):223-231.
55. Lahmeyer H, Wilcox C, Kann J, Leppik I. Subjective Efficacy of Zolpidem in Outpatients with Chronic Insomnia. *Clinical Drug Investigation*. 1997;13(3):134-144.
56. Lemoine P, Allain H, Janus C, Sutet P. Gradual withdrawal of zopiclone (7.5 mg) and zolpidem (10 mg) in insomniacs treated for at least 3 months. *European Psychiatry*. 1995;10:161s-165s.

57. Vicens C, Bejarano F, Sempere E, Mateu C, Fiol F, Socias I et al. Comparative efficacy of two interventions to discontinue long-term benzodiazepine use: cluster randomised controlled trial in primary care. *The British Journal of Psychiatry*. 2014;204(6):471-479.
58. Jacobs G, Pace-Schott E, Stickgold R, Otto M. Cognitive behavior therapy and pharmacotherapy for insomnia. *Archives of Internal Medicine*. 2004; 154:1888-1896
59. Wu R, Bao J, Zhang C, Deng J, Long C. Comparison of sleep condition and sleep-related psychological activity after cognitive-behavior and pharmacological therapy for chronic insomnia. *Psychotherapy and Psychosomatics*. 2006; 75:220-228
60. Morgan K, Dixon S, Mathers N, Thompson J, Tomeny M. Psychological treatment for insomnia in the management of long-term hypnotic drug use: a pragmatic randomised controlled trial. *British Journal of General Practice*. 2003, 53:923-928.
61. Morin CM, Colecchi C, Stone J, Sood R, Brink D. Behavioral and pharmacological therapies for late-life insomnia. *Journal of the American Medical Association*. 1999;281(11):991-999

## References for Appendix 2

1. Higgins J, Green S. *Cochrane handbook for systematic Reviews of Interventions* [Internet]. 2011. Available from: [www.cochrane-handbook.org](http://www.cochrane-handbook.org)
2. Baillargeon L, Landreville P, Verreault R, Beauchemin J, Grégoire J, Morin CM. Discontinuation of benzodiazepines among older insomniac adults treated with cognitive-behavioural therapy combined with gradual tapering: a randomized trial. 2003;169(10):1015–20.
3. Belleville G, Guay C, Guay B, Morin CM. Hypnotic taper with or without self-help treatment of insomnia: a randomized clinical trial. *J Consult Clin Psychol*. 2007 Apr;75(2):325–35.
4. Belleville G, Morin CM. Hypnotic discontinuation in chronic insomnia: impact of psychological distress, readiness to change, and self-efficacy. *Health Psychol*. 2008 Mar;27(2):239–48.
5. Curran H, Collins R, Fletcher S, Al E. Older adults and withdrawal from benzodiazepine hypnotics in general practice : effects on cognitive function , sleep , mood and quality of life. *Psych Med*. 2003;33:1223–37.
6. Garfinkel D, Zisapel N, Wainstein J, Laudon M. Facilitation of benzodiazepine discontinuation by melatonin: a new clinical approach. *Arch Intern Med* [Internet]. 1999 Nov 8;159(20):2456–60. Available from: <http://www.ncbi.nlm.nih.gov/pubmed/10665894>
7. Habraken H, Soenen K, Blondeel L, Al E. Gradual withdrawal from benzodiazepines in residents of homes for the elderly : experience and suggestions for future research. *Eur J Clin Pharmacol*. 1997;51:355–8.
8. Morin CM, Ph D, Bastien C, Guay B, Radouco-thomas M, Leblanc J, et al. Randomized Clinical Trial of Supervised Tapering and Cognitive Behavior Therapy to Facilitate Benzodiazepine Discontinuation in Older Adults With Chronic Insomnia. 2004;(February):332–42.

9. Morin CM, Bélanger L, Bastien C, Vallières A. Long-term outcome after discontinuation of benzodiazepines for insomnia: a survival analysis of relapse. *Behav Res Ther.* 2005 Jan;43(1):1–14.
10. Oude Voshaar R, Gorgels W, Anton A, Al E. Tapering off long-term benzodiazepine use with or without group cognitive – behavioural therapy : three-condition , randomised controlled trial apering off long-term benzodiazepine use with or without group cognitive ^ behavioural therapy : three-conditio. *Br J Psych.* 2003;182:498–504.
11. Oude Voshaar RC, Gorgels WJM, Mol a JJ, van Balkom a JLM, Mulder J, van de Lisdonk EH, et al. Long-term outcome of two forms of randomised benzodiazepine discontinuation. *Br J Psychiatry.* 2006 Feb;188:188–9.
12. Pat-Horenczyk R, Hacohe D, Herer P, Lavie P. The effects of substituting zopiclone in withdrawal from chronic use of benzodiazepine hypnotics. *Psychopharmacology (Berl).* 1998 Dec;140(4):450–7.
13. Shapiro CM, Sherman D, Peck DF. Withdrawal from benzodiazepines by initially switching to zopiclone. *Eur Psychiatry.* 1995;10:145s – 51s.
14. Vissers FHJ a, Knipschild PG, Crebolder HFJM. Is melatonin helpful in stopping the long-term use of hypnotics? A discontinuation trial. *Pharm World Sci.* 2007 Dec;29(6):641–6.

### Appendix 3. GRADE evidence tables.

#### GRADE Working Group grades of evidence

**High quality:** We are very confident that the true effect lies close to that of the estimate of the effect

**Moderate quality:** We are moderately confident in the effect estimate: The true effect is likely to be close to the estimate of the effect, but there is a possibility that it is substantially different

**Low quality:** Our confidence in the effect estimate is limited: The true effect may be substantially different from the estimate of the effect

**Very low quality:** We have very little confidence in the effect estimate: The true effect is likely to be substantially different from the estimate of effect

#### I. Tapering compared to Continuation/Usual Care<sup>†</sup> - 3 months[1,2]

| Quality assessment                                                                                                                                                               |                   |                      |               |              |                      |                      | No. of patients |              | Effect                 |                                                | Quality     | Importance |
|----------------------------------------------------------------------------------------------------------------------------------------------------------------------------------|-------------------|----------------------|---------------|--------------|----------------------|----------------------|-----------------|--------------|------------------------|------------------------------------------------|-------------|------------|
| No. of studies                                                                                                                                                                   | Study design      | Risk of bias         | Inconsistency | Indirectness | Imprecision          | Other considerations | Discontinuation | Continuation | Relative (95% CI)      | Absolute (95% CI)                              |             |            |
| Cessation rate (Taper vs. Usual Care) 12 weeks                                                                                                                                   |                   |                      |               |              |                      |                      |                 |              |                        |                                                |             |            |
| 1                                                                                                                                                                                | randomised trials | serious <sup>1</sup> | not serious   | not serious  | serious <sup>2</sup> | none                 | 73              | 34           | RR 3.45 (1.49 to 7.99) | 360 more per 1000 (from 117 more to 600 more)) | ⊕⊕⊕⊕<br>LOW |            |
| BWSQ (Taper vs. Continuation/Usual Care) for Group A - 12 week follow-up (Benzodiazepine Withdrawal Symptom Questionnaire: higher BWSQ suggests more severe withdrawal symptoms) |                   |                      |               |              |                      |                      |                 |              |                        |                                                |             |            |
| 2                                                                                                                                                                                | randomised trials | serious <sup>1</sup> | not serious   | not serious  | serious <sup>3</sup> | none                 | 121             | 77           | -                      | MD 0.62 <b>higher</b> (2.10 lower to           | ⊕⊕⊕⊕<br>LOW |            |

| Quality assessment                                                                                                                  |                   |              |               |              |                             |                      | No. of patients |              | Effect            |                                                         | Quality          | Importance |
|-------------------------------------------------------------------------------------------------------------------------------------|-------------------|--------------|---------------|--------------|-----------------------------|----------------------|-----------------|--------------|-------------------|---------------------------------------------------------|------------------|------------|
| No. of studies                                                                                                                      | Study design      | Risk of bias | Inconsistency | Indirectness | Imprecision                 | Other considerations | Discontinuation | Continuation | Relative (95% CI) | Absolute (95% CI)                                       |                  |            |
|                                                                                                                                     |                   |              |               |              |                             |                      |                 |              |                   | 3.33 higher)                                            |                  |            |
| Anxiety (Taper vs. Continuation) - 12 week follow-up (mean VAS out of 100 – higher score suggests worse anxiety)                    |                   |              |               |              |                             |                      |                 |              |                   |                                                         |                  |            |
| 1                                                                                                                                   | randomised trials | not serious  | not serious   | not serious  | serious <sup>3</sup>        | none                 | 48              | 43           | -                 | MD <b>2.3 lower</b><br>(3.14 lower to 1.4 lower)        | ⊕⊕⊕O<br>MODERATE |            |
| Problems sleeping (Taper vs. Continuation) - 12 week follow-up (mean VAS out of 100 – higher score suggests more problems sleeping) |                   |              |               |              |                             |                      |                 |              |                   |                                                         |                  |            |
| 1                                                                                                                                   | Randomized trials | not serious  | not serious   | not serious  | serious <sup>3</sup>        | none                 | 48              | 43           | -                 | MD <b>16.1 higher</b><br>(15.01 higher to 17.19 higher) | ⊕⊕⊕O<br>MODERATE |            |
| Prose Recall (Taper vs. Continuation) - 12 week follow-up (higher score suggests better recall)                                     |                   |              |               |              |                             |                      |                 |              |                   |                                                         |                  |            |
| 1                                                                                                                                   | randomised trials | not serious  | not serious   | not serious  | very serious <sup>3,4</sup> | none                 | 48              | 43           | -                 | MD <b>0.0</b><br>(1.02 lower to 1.02 higher)            | ⊕⊕OO<br>LOW      |            |

MD – mean difference, RR – relative risk † Continuation and usual care were grouped together, as the majority of usual care patients continued BZRAs

1. Not blinded, patients and physicians aware of deprescribing and this may affect outcome reporting
2. Number of events < 300
3. Number of participants is less than 400
4. Confidence interval includes both harm and benefit

## II. Tapering compared to Continuation/Usual Care<sup>†</sup> -- 12 months [1,3]

| Quality assessment                                                                                                                                               |                       |                      |               |              |                      |                      | No. of patients |              | Effect              |                                                 | Quality          | Importance |
|------------------------------------------------------------------------------------------------------------------------------------------------------------------|-----------------------|----------------------|---------------|--------------|----------------------|----------------------|-----------------|--------------|---------------------|-------------------------------------------------|------------------|------------|
| No. of studies                                                                                                                                                   | Study design          | Risk of bias         | Inconsistency | Indirectness | Imprecision          | Other considerations | Discontinuation | Continuation | Relative (95% CI)   | Absolute (95% CI)                               |                  |            |
| <b>Cessation rate (Taper versus Usual Care) – 13-15 month follow-up (Computerized Prescription Database Data)[3]</b>                                             |                       |                      |               |              |                      |                      |                 |              |                     |                                                 |                  |            |
| 1                                                                                                                                                                | randomised trials     | not serious          | not serious   | not serious  | serious <sup>1</sup> | none                 | 69              | 33           | 2.39 (1.08 to 4.11) | 211 more per 1000 (from 12 more to 471 more)    | ⊕⊕⊕○<br>MODERATE |            |
| <b>BWSQ (Taper vs. Continuation) - 52 week follow-up (Benzodiazepine Withdrawal Symptom Questionnaire: higher BWSQ suggests more severe withdrawal symptoms)</b> |                       |                      |               |              |                      |                      |                 |              |                     |                                                 |                  |            |
| 1                                                                                                                                                                | observational studies | serious <sub>2</sub> | not serious   | not serious  | serious <sub>3</sub> | none                 | 30              | 15           | -                   | MD <b>6.8 lower</b> (13.37 lower to 0.23 lower) | ⊕○○○<br>VERY LOW |            |
| <b>Anxiety (Taper vs. Continuation) - 52 week follow-up (mean VAS out of 100 – higher score suggests worse anxiety)</b>                                          |                       |                      |               |              |                      |                      |                 |              |                     |                                                 |                  |            |
| 1                                                                                                                                                                | observational studies | serious <sub>2</sub> | not serious   | not serious  | serious <sub>3</sub> | none                 | 30              | 15           | -                   | MD <b>8.3 lower</b> (9.88 lower to              | ⊕○○○<br>VERY LOW |            |



| Quality assessment                                                                                                                  |                       |                      |               |              |                      |                      | No. of patients |              | Effect            |                                           | Quality          | Importance |
|-------------------------------------------------------------------------------------------------------------------------------------|-----------------------|----------------------|---------------|--------------|----------------------|----------------------|-----------------|--------------|-------------------|-------------------------------------------|------------------|------------|
| No. of studies                                                                                                                      | Study design          | Risk of bias         | Inconsistency | Indirectness | Imprecision          | Other considerations | Discontinuation | Continuation | Relative (95% CI) | Absolute (95% CI)                         |                  |            |
|                                                                                                                                     |                       |                      |               |              |                      |                      |                 |              |                   | 6.72 lower)                               |                  |            |
| Problems sleeping (Taper vs. Continuation) - 52 week follow-up (mean VAS out of 100 – higher score suggests more problems sleeping) |                       |                      |               |              |                      |                      |                 |              |                   |                                           |                  |            |
| 1                                                                                                                                   | observational studies | serious <sup>2</sup> | not serious   | not serious  | serious <sup>3</sup> | none                 | 30              | 15           | -                 | MD 1.2 higher (0.48 lower to 2.88 higher) | ⊕○○○<br>VERY LOW |            |
| Prose Recall (Taper vs. 52 week follow-up (higher score suggests better recall)                                                     |                       |                      |               |              |                      |                      |                 |              |                   |                                           |                  |            |
| 1                                                                                                                                   | observational studies | serious <sup>2</sup> | not serious   | not serious  | serious <sup>3</sup> | none                 | 30              | 15           | -                 | MD 1.2 higher (0.62 lower to 3.02 higher) | ⊕○○○<br>VERY LOW |            |

MD – mean difference, RR – relative risk †In Curran 2003, group A randomized to immediate taper, group B randomized to taper benzodiazepines after 12 weeks, and group C chose to continue throughout, so at 52 weeks, this is comparison of tapering group A versus those who chose to continue (C) and is thus observational

1. Number of events < 300
2. 18/48 dropouts in intervention and 12/27 dropouts in control- risk of bias due to attrition
3. Number of participants < 400

III. CBT and Taper compared to Taper alone – 3 months [2,4–6]

| Quality assessment                                                                        |                   |                      |                          |                         |                      |                      | No. of patients |                                    | Effect                        |                                              | Quality  | Importance |
|-------------------------------------------------------------------------------------------|-------------------|----------------------|--------------------------|-------------------------|----------------------|----------------------|-----------------|------------------------------------|-------------------------------|----------------------------------------------|----------|------------|
| No. of studies                                                                            | Study design      | Risk of bias         | Inconsistency            | Indirectness            | Imprecision          | Other considerations | CBT and Taper   | Taper alone (all studies included) | Relative (95% CI)             | Absolute (95% CI)                            |          |            |
| Cessation rate - Cessation rate at 3 months                                               |                   |                      |                          |                         |                      |                      |                 |                                    |                               |                                              |          |            |
| 4                                                                                         | randomised trials | not serious          | serious <sup>1</sup>     | not serious             | serious <sup>2</sup> | none                 | 88/157 (56.1%)  | 72/147 (49.0%)                     | <b>RR 1.18</b> (0.87 to 1.61) | 88 more per 1000 (from 64 fewer to 299 more) | ⊕⊕○○ LOW |            |
| ISI - ISI at 3 months (Insomnia Severity Index: higher ISI suggests more severe insomnia) |                   |                      |                          |                         |                      |                      |                 |                                    |                               |                                              |          |            |
| 2                                                                                         | randomised trials | serious <sup>3</sup> | not serious              | not serious             | serious <sup>4</sup> | none                 | 49              | 48                                 | -                             | MD 0.42 higher (1.93 lower to 2.78 higher)   | ⊕⊕○○ LOW |            |
| Sleep efficiency (%) - Sleep efficiency at 3 months (better indicated by higher values)   |                   |                      |                          |                         |                      |                      |                 |                                    |                               |                                              |          |            |
| 2                                                                                         | randomised trials | serious <sup>3</sup> | no serious inconsistency | no serious indirectness | serious <sup>4</sup> | none                 | 49              | 48                                 | -                             | MD 4.64 higher (1.25 lower to 10.52 higher)  | ⊕⊕○○ LOW |            |

| Quality assessment                                                                                                                                   |                   |                      |                          |                         |                      |                      | No. of patients |                                    | Effect            |                                                  | Quality  | Importance |
|------------------------------------------------------------------------------------------------------------------------------------------------------|-------------------|----------------------|--------------------------|-------------------------|----------------------|----------------------|-----------------|------------------------------------|-------------------|--------------------------------------------------|----------|------------|
| No. of studies                                                                                                                                       | Study design      | Risk of bias         | Inconsistency            | Indirectness            | Imprecision          | Other considerations | CBT and Taper   | Taper alone (all studies included) | Relative (95% CI) | Absolute (95% CI)                                |          |            |
| Total sleep time(minutes) - Total Sleep time at 3 months (better indicated by higher values)                                                         |                   |                      |                          |                         |                      |                      |                 |                                    |                   |                                                  |          |            |
| 2                                                                                                                                                    | randomised trials | serious <sup>3</sup> | no serious inconsistency | no serious indirectness | serious <sup>4</sup> | none                 | 49              | 48                                 | -                 | MD 2.77 lower (43.83 lower to 38.29 higher)      | ⊕⊕⊕⊕ LOW |            |
| CIWA B - CIWA-B at 3 months (Clinical Institute Withdrawal Assessment Scale- Benzodiazepine: higher CIWA-B suggests more severe withdrawal symptoms) |                   |                      |                          |                         |                      |                      |                 |                                    |                   |                                                  |          |            |
| 1                                                                                                                                                    | randomised trials | serious <sup>5</sup> | not serious              | not serious             | serious <sup>4</sup> | none                 | 22              | 23                                 | -                 | MD <b>1.97 lower</b> (9.76 lower to 5.82 higher) | ⊕⊕⊕⊕ LOW |            |
| STAI-State - STAI-State at 3 months (State Trait Anxiety Inventory: higher STAI suggests more severe anxiety)                                        |                   |                      |                          |                         |                      |                      |                 |                                    |                   |                                                  |          |            |
| 1                                                                                                                                                    | randomised trials | serious <sup>5</sup> | not serious              | not serious             | serious <sup>4</sup> | none                 | 22              | 23                                 | -                 | MD <b>2.48 lower</b> (9.20 lower to 4.24 higher) | ⊕⊕⊕⊕ LOW |            |
| SF-36 (mental health component score) - SF-36 at 3 months (Short Form 36 Health Survey: lower SF-36 score suggests more disability)                  |                   |                      |                          |                         |                      |                      |                 |                                    |                   |                                                  |          |            |

| Quality assessment |                   |                      |               |              |                      |                      | No. of patients |                                    | Effect            |                                                      | Quality     | Importance |
|--------------------|-------------------|----------------------|---------------|--------------|----------------------|----------------------|-----------------|------------------------------------|-------------------|------------------------------------------------------|-------------|------------|
| No. of studies     | Study design      | Risk of bias         | Inconsistency | Indirectness | Imprecision          | Other considerations | CBT and Taper   | Taper alone (all studies included) | Relative (95% CI) | Absolute (95% CI)                                    |             |            |
| 1                  | randomised trials | serious <sup>2</sup> | not serious   | not serious  | serious <sup>4</sup> | none                 | 22              | 23                                 | -                 | MD <b>0.64 lower</b><br>(11.02 lower to 9.74 higher) | ⊕⊕○○<br>LOW |            |

MD – mean difference, RR – relative risk

1. I squared = 49% suggesting inconsistency
2. Number of events <300
3. Concerns surrounding blinding (patients and clinicians not blinded, which may affect outcome reporting)
4. Sample size <400
5. Concerns surrounding incomplete outcome data and blinding

#### IV. CBT and Taper compared to Taper alone – 6 and 12 months [3–5]

| Quality assessment                                 |                   |              |                      |              |                      |                      | No. of patients |             | Effect                           |                                           | Quality     | Importance |
|----------------------------------------------------|-------------------|--------------|----------------------|--------------|----------------------|----------------------|-----------------|-------------|----------------------------------|-------------------------------------------|-------------|------------|
| No. of studies                                     | Study design      | Risk of bias | Inconsistency        | Indirectness | Imprecision          | Other considerations | CBT and Taper   | Taper alone | Relative (95% CI)                | Absolute (95% CI)                         |             |            |
| Cessation rate - Cessation rate at 12 months [3–5] |                   |              |                      |              |                      |                      |                 |             |                                  |                                           |             |            |
| 3                                                  | randomised trials | not serious  | serious <sup>1</sup> | not serious  | serious <sup>2</sup> | none                 | 59/124          | 45/118      | <b>RR 1.30</b><br>(0.68 to 2.47) | 114 more per 1000 (from 122 fewer to 561) | ⊕⊕○○<br>LOW |            |

| Quality assessment                                                                                      |                   |                      |                          |                         |                      |                      | No. of patients |             | Effect            |                                                       | Quality     | Importance |
|---------------------------------------------------------------------------------------------------------|-------------------|----------------------|--------------------------|-------------------------|----------------------|----------------------|-----------------|-------------|-------------------|-------------------------------------------------------|-------------|------------|
| No. of studies                                                                                          | Study design      | Risk of bias         | Inconsistency            | Indirectness            | Imprecision          | Other considerations | CBT and Taper   | Taper alone | Relative (95% CI) | Absolute (95% CI)                                     |             |            |
|                                                                                                         |                   |                      |                          |                         |                      |                      |                 |             |                   | more)                                                 |             |            |
| ISI - ISI at 12 months (Insomnia Severity Index: higher ISI suggests more severe insomnia)              |                   |                      |                          |                         |                      |                      |                 |             |                   |                                                       |             |            |
| 1                                                                                                       | randomised trials | serious <sup>3</sup> | not serious              | not serious             | serious <sup>4</sup> | none                 | 27              | 25          | -                 | MD <b>1.09 higher</b><br>(0.47 higher to 1.71 higher) | ⊕⊕○○<br>LOW |            |
| Sleep efficiency% - Sleep efficiency at 12 months (better indicated by higher values)                   |                   |                      |                          |                         |                      |                      |                 |             |                   |                                                       |             |            |
| 1                                                                                                       | randomised trials | serious <sup>3</sup> | no serious inconsistency | no serious indirectness | serious <sup>4</sup> | none                 | 27              | 25          | -                 | MD 2.94 higher<br>(4.2 lower to 10.08 higher)         | ⊕⊕○○<br>LOW |            |
| Total sleep time(minutes) - Total Sleep time at 12 months follow-up (better indicated by higher values) |                   |                      |                          |                         |                      |                      |                 |             |                   |                                                       |             |            |
| 1                                                                                                       | randomised trials | serious <sup>3</sup> | no serious inconsistency | no serious indirectness | serious <sup>4</sup> | none                 | 27              | 25          | -                 | MD 1.17 higher<br>(39.63 lower to 41.97 higher)       | ⊕⊕○○<br>LOW |            |

| Quality assessment                                                                                                                                   |                   |                      |               |              |                      |                      | No. of patients |             | Effect            |                                                      | Quality     | Importance |
|------------------------------------------------------------------------------------------------------------------------------------------------------|-------------------|----------------------|---------------|--------------|----------------------|----------------------|-----------------|-------------|-------------------|------------------------------------------------------|-------------|------------|
| No. of studies                                                                                                                                       | Study design      | Risk of bias         | Inconsistency | Indirectness | Imprecision          | Other considerations | CBT and Taper   | Taper alone | Relative (95% CI) | Absolute (95% CI)                                    |             |            |
| CIWA B - CIWA-B at 6 months (Clinical Institute Withdrawal Assessment Scale- Benzodiazepine: higher CIWA-B suggests more severe withdrawal symptoms) |                   |                      |               |              |                      |                      |                 |             |                   |                                                      |             |            |
| 1                                                                                                                                                    | randomised trials | serious <sup>5</sup> | not serious   | not serious  | serious <sup>4</sup> | none                 | 19              | 24          | -                 | MD <b>1.62 higher</b><br>(5.51 lower to 8.75 higher) | ⊕⊕⊕⊕<br>LOW |            |
| STAI-State - STAI-State at 6 months (State Trait Anxiety Inventory: higher STAI suggests more severe anxiety)                                        |                   |                      |               |              |                      |                      |                 |             |                   |                                                      |             |            |
| 1                                                                                                                                                    | randomised trials | serious <sup>5</sup> | not serious   | not serious  | serious <sup>4</sup> | none                 | 19              | 24          | -                 | MD <b>4.13 lower</b><br>(9.63 lower to 1.37 higher)  | ⊕⊕⊕⊕<br>LOW |            |
| SF-36 (mental health component score) - SF-36 at 6 months (Short Form 36 Health Survey: lower SF-36 score suggests more disability)                  |                   |                      |               |              |                      |                      |                 |             |                   |                                                      |             |            |
| 1                                                                                                                                                    | randomised trials | serious <sup>5</sup> | not serious   | not serious  | serious <sup>4</sup> | none                 | 19              | 24          | -                 | MD <b>1.09 lower</b><br>(10.90 lower to 8.72 higher) | ⊕⊕⊕⊕<br>LOW |            |

MD – mean difference, RR – relative risk

1. I squared = 78% suggesting inconsistency
2. Number of events <300
3. Patients and clinicians not blinded, may influence outcome assessment
4. Sample size <400

### References for Appendix 3

1. Curran H, Collins R, Fletcher S, Al E. Older adults and withdrawal from benzodiazepine hypnotics in general practice : effects on cognitive function , sleep , mood and quality of life. *Psych Med.* 2003;33:1223–37.
2. Oude Voshaar R, Gorgels W, Anton A, Al E. Tapering off long-term benzodiazepine use with or without group cognitive – behavioural therapy : three-condition , randomised controlled trial apering off long-term benzodiazepine use with or without group cognitive ^ behavioural therapy : three-conditio. *Br J Psych.* 2003;182:498–504.
3. Oude Voshaar RC, Gorgels WJMJ, Mol a JJ, van Balkom a JLM, Mulder J, van de Lisdonk EH, et al. Long-term outcome of two forms of randomised benzodiazepine discontinuation. *Br J Psychiatry.* 2006 Feb;188:188–9.
4. Belleville G, Guay C, Guay B, Morin CM. Hypnotic taper with or without self-help treatment of insomnia: a randomized clinical trial. *J Consult Clin Psychol.* 2007 Apr;75(2):325–35.
5. Morin CM, Ph D, Bastien C, Guay B, Radouco-thomas M, Leblanc J, et al. Randomized Clinical Trial of Supervised Tapering and Cognitive Behavior Therapy to Facilitate Benzodiazepine Discontinuation in Older Adults With Chronic Insomnia. 2004;(February):332–42.
6. Baillargeon L, Landreville P, Verreault R, Beauchemin J, Grégoire J, Morin CM. Discontinuation of benzodiazepines among older insomniac adults treated with cognitive-behavioural therapy combined with gradual tapering: a randomized trial. 2003;169(10):1015–20.

#### Appendix 4. Range of frequency ratios for harms associated with BZRA use.

| Harm                                  | Effect estimate (95% confidence interval)                                                                                                                                                                                                                                                                                                                        | Comment                                                                                                                                                                                                                                                                                                                                |
|---------------------------------------|------------------------------------------------------------------------------------------------------------------------------------------------------------------------------------------------------------------------------------------------------------------------------------------------------------------------------------------------------------------|----------------------------------------------------------------------------------------------------------------------------------------------------------------------------------------------------------------------------------------------------------------------------------------------------------------------------------------|
| Increased risk of fractures           | <p><b>Use of BZDs vs. non-use</b><br/> RR 1.40 (1.24 – 1.58) [1]<br/> OR 2.1 (1.5 – 2.9) [2]<br/> RR 1.34 (1.25 – 1.45) [3]<br/> <b>Zoplidem and zopiclone vs. non-use</b><br/> OR 1.28 (0.88 – 1.85) [3]<br/> <b>Long half-life BZDs vs. non-use</b><br/> OR 1.7 (1.5 – 2.0) [4]<br/> <b>Taking 2+ BZDs vs. non-use in men</b><br/> RR 4.7 (1.4 – 15.7) [5]</p> | <p>A 2005 meta-analysis[6] also reported increased fracture risk with BZRAs though did not report an estimate. One study included only adults 65 years or older [5] , while the mean age was 76 years of age in another [2]. Age was not described in the remainder of studies. Only 2 studies available specifically for z-drugs.</p> |
| Increased risk of falls               | <p><b>Any sedative hypnotic</b><br/> OR 1.54 (1.40 – 1.70) [7]<br/> OR 1.31 (1.14 – 1.50) [8]<br/> <b>Short-acting BZD</b><br/> OR 1.44 (1.09 – 1.90) [7]<br/> <b>Long-acting BZD</b><br/> OR 1.32 (0.98 – 1.77) [7]</p>                                                                                                                                         | <p>The mean age from studies included in one meta-analysis ranged from 69 to 87 years of age [8].</p>                                                                                                                                                                                                                                  |
| Injury (includes falls and fractures) | <p><b>Compared to non-use [9]</b><br/> Oxazepam: HR 1.46 (1.17 – 1.81)<br/> Chlordiazepoxide: HR 2.20 (1.39 – 3.47)<br/> Flurazepam: HR1.93 (1.53 – 2.44)<br/> Lorazepam: HR 1.29 (1.14 – 1.46)<br/> Temazepam: HR1.23 (1.01 – 1.51)</p>                                                                                                                         | <p>The mean age in this study was 73.4 years of age</p>                                                                                                                                                                                                                                                                                |
| Anterograde amnesia                   | <p><b>Compared to non-use [10]</b><br/> Alprazolam: OR 8.0 (4.7 – 13.7)<br/> Bromazepam: OR 7.6 (4.4 – 13.0)<br/> Clonazepam: OR 7.2 (4.4 – 11.7)<br/> Lorazepam: OR 6.8 (3.2 – 14.4)<br/> Prazepam: OR 7.3 (3.3 – 16.5)<br/> Tetraepam: OR 2.4 (1.0 – 5.8)</p>                                                                                                  | <p>The median age of this study was 54 years of age</p>                                                                                                                                                                                                                                                                                |



|                           |                                                                                                                                                                                                                                                                                                                                                                                                                                                                                                                                    |                                                                                                                          |
|---------------------------|------------------------------------------------------------------------------------------------------------------------------------------------------------------------------------------------------------------------------------------------------------------------------------------------------------------------------------------------------------------------------------------------------------------------------------------------------------------------------------------------------------------------------------|--------------------------------------------------------------------------------------------------------------------------|
|                           | Zolpidem: OR 23.9 (17.9 – 31.9)<br>Zopiclone: OR 8.7 (5.2 – 14.3)                                                                                                                                                                                                                                                                                                                                                                                                                                                                  |                                                                                                                          |
| Dementia and BZD exposure | <p><b>Compared to non-use</b><br/>HR 1.60 (1.08 – 2.38) [11]<br/>OR 3.50 (1.57 – 7.79) [12]</p> <p>Ever use OR 1.7 (1.2 – 2.4) [13]<br/>Former use OR 2.3 (1.2 – 4.5) [13]<br/>Current use OR 1.0 (0.6 – 1.6) [13],<br/>OR 2.71(2.46 – 2.99) [14]</p> <p><b>Alzheimer’s Disease</b><br/>OR 1.43 (1.28 – 1.60) [15]</p> <p><b>Alzheimer’s Disease/Dementia</b><br/>HR 1.25 (1.03 – 1.51) for 1-30 daily doses [16]<br/>HR 1.31 (1.00 – 1.71) for 31-120 daily doses [16]<br/>HR 1.07 (0.82 – 1.39) for &gt;120 daily doses [16]</p> |                                                                                                                          |
| Functional Impairment     | <p><b>Compared to non-use of BZDs</b></p> <p><b>Loss of physical function</b><br/>HR 1.51 (1.02 – 2.24) [17]</p> <p><b>Develop mobility problems</b><br/>HR 1.23 (1.09 – 1.39) [18]</p> <p><b>Develop ADL disability</b><br/>HR 1.28 (1.09 – 1.52) [18]</p>                                                                                                                                                                                                                                                                        | Older adults (65 years of age or older)                                                                                  |
| Depression                | RR 1.6 (1.05 – 2.55) [19]                                                                                                                                                                                                                                                                                                                                                                                                                                                                                                          | Subjects were 85 years of age and older; measured risk of developing new depressive symptoms within 1 year for BZD users |

|                         |                                                                                                                                                                                                                                                                                                                                                                                                  |                                                                                                                   |
|-------------------------|--------------------------------------------------------------------------------------------------------------------------------------------------------------------------------------------------------------------------------------------------------------------------------------------------------------------------------------------------------------------------------------------------|-------------------------------------------------------------------------------------------------------------------|
| Pulmonary [20]          | <p><b>Hospitalization for COPD or pneumonia</b><br/>RR 1.09 (1.00 – 1.20)</p> <p><b>Respiratory exacerbations</b><br/>RR 1.45 (1.36 – 1.54)</p> <p><b>ER visits for COPD or pneumonia</b><br/>RR 1.92 (1.69 – 2.18)</p>                                                                                                                                                                          | Measured outcomes within 30 days of incident BZD use vs. non-use (retrospective cohort); mean age 77 years of age |
| Motor vehicle accidents | <p><b>Traffic accidents [21]</b><br/>OR 1.59(1.10 – 2.31)</p> <p><b>Accident responsibility [21]</b><br/>OR 1.41(1.03 – 1.94)</p> <p><b>Sub-group analysis based on age (case-control studies only) [21]</b><br/>&gt;65 y.o.: OR 1.13 (0.97 – 1.31)<br/>&lt;65 y.o.: OR 2.21 (1.31 – 3.73)</p> <p><b>Involvement in accident after 1 year of BZD exposure [22]</b><br/>RR 1.26 (1.09 – 1.45)</p> | Subjects 67-84 years of age in nested case-control [22]                                                           |

#### References for Appendix 4

1. Khong TP, de Vries F, Goldenberg JSB, Klungel OH, Robinson NJ, Ibáñez L, et al. Potential impact of benzodiazepine use on the rate of hip fractures in five large European countries and the United States. *Calcif Tissue Int.* 2012 Jul;91(1):24–31.
2. Chang C-M, Wu EC-H, Chang I-S, Lin K-M. Benzodiazepine and risk of hip fractures in older people: a nested case-control study in Taiwan. *Am J Geriatr Psychiatry.* American Association for Geriatric Psychiatry; 2008 Aug;16(8):686–92.
3. Takkouche B, Gill SS, Etminan M. Psychotropic Medications and the Risk of Fracture. *2007;30(2):171–84.*
4. Ray WA, Griffin MR, Downey W. Benzodiazepines of long and short elimination half-life and the risk of hip fracture. *JAMA.* 1989 Dec;262(23):3303–7.
5. Nurminen J, Puustinen J, Piirtola M, Vahlberg T, Kivelä S-L. Psychotropic drugs and the risk of fractures in old age: a prospective population-based study. *BMC Public Health.* 2010 Jan;10:396.

6. Glass J, Lanctôt KL, Herrmann N, Sproule B a, Busto UE. Sedative hypnotics in older people with insomnia: meta-analysis of risks and benefits. *BMJ*. 2005 Nov;331(7526):1169.
7. Leipzig RM, Cumming RG, Tinetti ME. Drugs and falls in older people: a systematic review and meta-analysis: I. Psychotropic drugs. *J Am Geriatr Soc*. 1999 Jan;47(1):30–9.
8. Woolcott J, Richardson K, Wiens M, Al E. Meta-analysis of the Impact of 9 Medication Classes on Falls in Elderly Persons. *Arch Intern Med*. 2009;169(21):1952–60.
9. Tamblyn R, Abrahamowicz M, du Berger R, McLeod P, Bartlett G. A 5-year prospective assessment of the risk associated with individual benzodiazepines and doses in new elderly users. *J Am Geriatr Soc*. 2005 Feb;53(2):233–41.
10. Chavant F, Favrelière S, Lafay-Chebassier C, Plazanet C, Pérault-Pochat M-C. Memory disorders associated with consumption of drugs: updating through a case/noncase study in the French Pharmacovigilance Database. *Br J Clin Pharmacol*. 2011 Dec;72(6):898–904.
11. Billioti de Gage S, Bégaud B, Bazin F, Verdoux H, Dartigues J-F, Pérès K, et al. Benzodiazepine use and risk of dementia: prospective population based study. *BMJ*. 2012 Jan;345:e6231.
12. Gallacher J, Elwood P, Pickering J, Bayer A, Fish M, Ben-Shlomo Y. Benzodiazepine use and risk of dementia: evidence from the Caerphilly Prospective Study (CaPS). *J Epidemiol Community Health*. 2012 Oct;66(10):869–73.
13. Lagnaoui R, Bégaud B, Moore N, Chaslerie A, Fourrier A, Letenneur L, et al. Benzodiazepine use and risk of dementia : A nested case – control study. *J Clin Epidemiol*. 2002;55:314–8.
14. Wu C-S, Ting T-T, Wang S-C, Chang I-S, Lin K-M. Effect of benzodiazepine discontinuation on dementia risk. *Am J Geriatr Psychiatry*. 2011 Feb;19(2):151–9.
15. Billioti de Gage S, Moride Y, Ducruet T, Kurth T, Verdoux H, Tournier M, et al. Benzodiazepine use and risk of Alzheimer’s disease: case-control study. *BMJ*. 2014 Jan;349:g5205.
16. Gray SL, Dublin S, Yu O, Walker R, Anderson M, Hubbard RA, et al. Benzodiazepine use and risk of incident dementia or cognitive decline: prospective population based study. *BMJ* [Internet]. 2016;352:i90. Available from: <http://www.ncbi.nlm.nih.gov/pubmed/26837813>
17. Gray SL, LaCroix AZ, Blough D, Wagner EH, Koepsell TD, Buchner D. Is the Use of Benzodiazepines Associated with Incident Disability? *J Am Geriatr Soc*. 2002 Jun;50(6):1012–8.
18. Gray SL, LaCroix AZ, Hanlon JT, Penninx BWJH, Blough DK, Leveille SG, et al. Benzodiazepine use and physical disability in community-dwelling older adults. *J Am Geriatr Soc*. 2006 Feb;54(2):224–30.

19. van Vliet P, van Der Mast RC, van Den Broek M. Use of benzodiazepines , depressive symptoms and cognitive function in old age. *Int J Geriatr Psychiatry*. 2009;(October 2008):500–8.
20. Vozoris NT, Fischer HD, Wang X, Stephenson AL, Gershon AS, Gruneir A, et al. Benzodiazepine drug use and adverse respiratory outcomes among older adults with COPD. *Eur Respir J*. 2014 Aug;44(2):332–40.
21. Dassanayake T, Michie P, Carter G, Jones A. Effects of Benzodiazepines , Antidepressants and Opioids on Driving. 2011;34(2):125–56.
22. Hemmelgarn B, Suissa S, Huang A, Boivin JF, Pinard G. Benzodiazepine use and the risk of motor vehicle crash in the elderly. *JAMA*. 1997 Jul;278(1):27–31.

## **Appendix 5. Evidence reviews.**

### **Summary of Systematic Review Findings**

Our systematic review identified 13 eligible studies (9 randomized controlled trials, three follow-up studies from three of the 9 RCTs, and one trial with two randomised intervention arms and a non-randomised control arm) investigating deprescribing of BZRAs for insomnia. Deprescribing modalities considered for this guideline included tapering of BZRAs, use of CBT, tapering plus CBT, use of melatonin or switching to and tapering of zopiclone.

Three RCTs compared tapering of BZRAs to continued use or usual care, and one study reported long-term outcomes from one of these trials [1–4]. Compared to usual care, tapering of BZRAs improved cessation rates (low quality evidence) at 3 months follow up (RR 3.45, 95% CI 1.49 to 7.99) [2]. Tapering did not result in increased withdrawal symptoms compared to usual care or continuation, as measured by overall withdrawal symptom scores (such as the benzodiazepine withdrawal symptom questionnaire [BWSQ]). At 12 months, there was very low certainty in findings of no significant difference in problems sleeping between those who discontinued BZRAs and those who continued (score out of 100 [higher scores suggest more problems sleeping], MD 1.2, 95% CI -0.48 to 2.88) [1]. In one study, the tapering group had significantly more problems sleeping at 3 months compared to those continuing BZRAs [1]. However, in this study sleep did not worsen in the tapering group from baseline. The difference in problems sleeping reflected an improvement in sleep from baseline for the continuation group. These findings suggest that tapering improves cessation rates compared to usual care without an increase in severity of withdrawal symptoms or worsening of sleep.

We found four RCTs comparing CBT and tapering to tapering alone, and three studies reporting long-term follow-up on three of those trials [2,4–9]. CBT and tapering improved cessation rates post-treatment compared to tapering alone (RR 1.95, 95% CI 1.44 to 2.63, low quality evidence). However, improved cessation rates were not maintained at 3 months or at 12 months (low quality evidence). There was low quality evidence for the lack of significant difference between CBT and tapering and tapering alone in State Trait Anxiety Inventory (STAI) scores at 3 months or 6 months. Withdrawal symptom scores were no different between CBT and tapering versus tapering alone at 3 months or 12 months. There was no significant difference in insomnia severity or sleep outcomes between CBT and tapering and tapering alone at 3 months and 12 months (low quality evidence).

We also identified two studies looking at switching to zopiclone to facilitate deprescribing [10,11]; however, these studies did not report useable data. Two studies of switching to melatonin were identified [12,13]. There was no difference in cessation rates for tapering compared to tapering plus melatonin at six weeks (RR 1.83, 95% CI 0.70 to 4.75 - GRADE assessment not done).

### **Harms of continued BZRA use**

As a class, BZRAs are an effective group of drugs for short term treatment of insomnia [14]. However, over time evidence has emerged that suggests there are long-term harms or adverse effects associated with BZRAs, particularly in older persons. We conducted a review of harms of continued BZRA use in adults by searching PubMed, EMBASE via OVID, the Cochrane Library and PsychINFO (search strategy developed by health sciences librarian, available upon request).

One research assistant reviewed titles and abstracts to identify systematic reviews, RCTs, case-control studies and prospective or retrospective comparative cohort studies that assessed harms of BZRA use, and this screen was checked by another research assistant. Results from eligible studies were extracted and synthesized into a summary table by one GDT member (CS).

The associated risks of BZRA use appear to be greater in older adults versus younger adults. One systematic review found approximately 25% of older adults using benzodiazepines reported adverse events, compared to only 10% in the placebo group (trials ranging from 1 day to 8 weeks) [15]. BZRAs have been associated with physical dependence, falls, memory disorders, dementia, functional impairment, and motor vehicle accidents, risks which may be increased in older persons [15–21]. Fracture risk may be increased with alprazolam, lorazepam and zolpidem by use of interacting drugs (drugs which inhibit metabolism of these agents, or are CNS-active) [22]. A 2005 meta-analysis reported that the number needed to harm for any adverse event was 6 (95% confidence interval [CI] 4.7 to 7.1) [21]. Commonly reported side effects include drowsiness, balance issues, and memory disturbance with meta-analysis results suggesting no difference in odds of cognitive or psychomotor adverse events between z-drugs and benzodiazepines [14,21]. Cognitive impairment is one of the greatest concerns in older adults. Sedative-hypnotics have the expected effect of sedation, leading to the risk of performing poorly on cognitive tests. However, there is some concern that these effects may not abate with long-term use [23]. In one meta-analysis, after an average of 10 years of use, 12 different tests for cognition showed deficits [18]. Another meta-analysis found amnestic and non-amnestic deficits in benzodiazepine users [24]. BZRAs were found in a large database study to be associated with memory disorders, including retrograde amnesia [25]. In 2014, Health Canada concluded that zopiclone was associated with next-day impairment including altered driving skills and

recommended a maximum dose in the elderly of 5 mg [26]. A detailed table summarizing effect estimates for various harms can be found in Appendix 4.

### **Values and patient preferences related to BZRAs**

Interview (n=192 patients, mean age 77 years, and n=72 physicians in United Kingdom) and survey (n=93 patients, mean age 77 years, and n=25 physicians in Canada) data comparing patient and physician perceptions suggests patients tend to rate benefits of BZRAs higher than physicians, and the risks lower [27,28]. Practitioners often anticipate difficulty persuading patients to stop benzodiazepines, concerned about their own workload and how patients will react to being encouraged to stop [28]. Patients commonly state that their physicians have not informed them of potential side effects of BZRAs and that they do not know how their physician feels about their BZRA use but feel reassured about the safety of these medications due to continued BZRA renewals [27–29].

Many older persons prefer not to consult a physician about poor sleep due to fear of receiving more medication that they associate with side effects such as drowsiness or losing control over what they consider to be a natural process (survey of n=62 adults, 65 years of older in United Kingdom) [30]. Some elderly who take sleep medications, particularly benzodiazepines, say they would like to stop but worry about insomnia (interviews with n=64 adults, 41% 70 years or older in United Kingdom; interviews with n=46 adults, mean age 71 years in USA) [28,29,31,32]. Some state strongly that they cannot do without their benzodiazepine and would not agree to discontinuation (cross-sectional study of n=111, 65 years or older in Ireland)



[32,33]. Many describe having side effects such as memory or concentration difficulties [29,31]. Others minimize or deny the presence of side effects [32].

Those patients interested in stopping benzodiazepines see potential improvements in thinking and memory as benefits, as well as obtaining a more natural sleep [28]. Of those who failed benzodiazepine discontinuation, many describe having experienced such failure as difficulty in sleeping within a few days of stopping [28].

### **Resource implications and cost-effectiveness**

An estimated 100 million Canadian dollars (CAD) was spent on BZRAs in 2010 by Canadian public drug programs (data from five provinces only) according to the Canadian Institute for Health Information [34][35]. The Canadian Rx Atlas reported that \$330 million CAD (public or private drug plans, patient) was spent on BZRAs in Canada in 2012/2013, while the average Canadian 65+ years of age spent \$26 CAD annually on a BZRA over this time [36]. A Dutch economic analysis calculated cost per incremental successful BZRA discontinuation and showed a favourable saving of 49 Euros for tapering over tapering plus CBT at 18 months [37].

Modelling studies (cost-consequence analysis) suggest that using CBT to manage insomnia represents a mean cost savings of \$25,743 CAD per quality adjusted life year due to fewer falls [38]. In this analysis, when the cost of falls were accounted for in older adults, treating insomnia using CBT was less expensive than using benzodiazepines by \$177 CAD per person. A health survey of 2320 older persons in Quebec showed that a subset of patients taking inappropriate BZRAs (classified based on Beers Criteria) were more likely to be hospitalized and visit

emergency rooms compared to those taking BZRAs appropriately, representing an additional healthcare cost of \$3076 CAD per patient [34].

## References for Appendix 5

1. Curran H, Collins R, Fletcher S, Al E. Older adults and withdrawal from benzodiazepine hypnotics in general practice : effects on cognitive function , sleep , mood and quality of life. *Psych Med.* 2003;33:1223–37.
2. Oude Voshaar R, Gorgels W, Anton A, Al E. Tapering off long-term benzodiazepine use with or without group cognitive – behavioural therapy : three-condition , randomised controlled trial apering off long-term benzodiazepine use with or without group cognitive ^ behavioural therapy : three-conditio. *Br J Psych.* 2003;182:498–504.
3. Habraken H, Soenen K, Blondeel L, Al E. Gradual withdrawal from benzodiazepines in residents of homes for the elderly : experience and suggestions for future research. *Eur J Clin Pharmacol.* 1997;51:355–8.
4. Oude Voshaar RC, Gorgels WJM, Mol a JJ, van Balkom a JLM, Mulder J, van de Lisdonk EH, et al. Long-term outcome of two forms of randomised benzodiazepine discontinuation. *Br J Psychiatry.* 2006 Feb;188:188–9.
5. Morin CM, Ph D, Bastien C, Guay B, Radouco-thomas M, Leblanc J, et al. Randomized Clinical Trial of Supervised Tapering and Cognitive Behavior Therapy to Facilitate Benzodiazepine Discontinuation in Older Adults With Chronic Insomnia. 2004;(February):332–42.
6. Morin CM, Bélanger L, Bastien C, Vallières A. Long-term outcome after discontinuation of benzodiazepines for insomnia: a survival analysis of relapse. *Behav Res Ther.* 2005 Jan;43(1):1–14.
7. Belleville G, Guay C, Guay B, Morin CM. Hypnotic taper with or without self-help treatment of insomnia: a randomized clinical trial. *J Consult Clin Psychol.* 2007 Apr;75(2):325–35.
8. Belleville G, Morin CM. Hypnotic discontinuation in chronic insomnia: impact of psychological distress, readiness to change, and self-efficacy. *Health Psychol.* 2008 Mar;27(2):239–48.
9. Baillargeon L, Landreville P, Verreault R, Beauchemin J, Grégoire J, Morin CM. Discontinuation of benzodiazepines among older insomniac adults treated with cognitive-behavioural therapy combined with gradual tapering: a randomized trial. 2003;169(10):1015–20.
10. Pat-Horenczyk R, Hacoheh D, Herer P, Lavie P. The effects of substituting zopiclone in withdrawal from chronic use of benzodiazepine hypnotics. *Psychopharmacology (Berl).*

1998 Dec;140(4):450–7.

11. Shapiro CM, Sherman D, Peck DF. Withdrawal from benzodiazepines by initially switching to zopiclone. *Eur Psychiatry*. 1995;10:145s – 51s.
12. Garfinkel D, Laudon M, Zisapel N. Improvement of sleep quality by controlled-release melatonin in benzodiazepine-treated elderly insomniacs. *Arch Gerontol Ger*. 1997;24:223–31.
13. Vissers FHJ a, Knipschild PG, Crebolder HFJM. Is melatonin helpful in stopping the long-term use of hypnotics? A discontinuation trial. *Pharm World Sci*. 2007 Dec;29(6):641–6.
14. Holbrook A, Crowther R, Lotter A, et al. The Role of Benzodiazepines in the Treatment of Insomnia. *CMAJ*. 2000;162:25–33.
15. Sithamparanathan K, Sadera A, Leung L. Adverse effects of benzodiazepine use in elderly people : a meta-analysis. *Asian J Gerontol Geriatr*. 2012;7(2):107–11.
16. Article R. Meta-analysis of the Impact of 9 Medication Classes on Falls in Elderly Persons. 2009;169(21):1952–60.
17. Takkouche B, Gill SS, Etminan M. Psychotropic Medications and the Risk of Fracture. 2007;30(2):171–84.
18. Barker MJ, Greenwood KM, Jackson M, Crowe SF. Cognitive Effects of Long-Term Benzodiazepine Use. 2004;18(1):37–48.
19. Orriols L, Salmi L, Philip P. The impact of medicinal drugs on traffic safety : a systematic review of epidemiological studies y. 2009;(May):647–58.
20. Rapoport MJ, Lanctôt KL, Streiner DL, Bédard M, Vingilis E, Murray B, et al. Benzodiazepine use and driving: a meta-analysis. *J Clin Psychiatry*. 2009 May;70(5):663–73.
21. Glass J, Lanctôt KL, Herrmann N, Sproule B a, Busto UE. Sedative hypnotics in older people with insomnia: meta-analysis of risks and benefits. *BMJ*. 2005 Nov;331(7526):1169.
22. Zint K, Haefeli W, Glynn R, Al E. Impact of drug interactions, dosage, duration of therapy on the risk of hipe fracture associated with benzodiazepine use in older adults. *Pharmacoevidemiol Drug Saf*. 2010;19(12):1248–55.
23. Rummans TA, Davis LJ, Morse RM, Ivnik RJ. Learning and memory impairment in older, detoxified, benzodiazepine-dependent patients. *Mayo Clin Proc*. 1993 Aug;68(8):731–7.
24. Tannenbaum C, Paquette A, Hilmer S, Holroyd-leduc J, Carnahan R. A Systematic Review of Amnestic and Non-Amnestic Mild Cognitive Impairment Induced by Anticholinergic , Antihistamine , GABAergic and Opioid Drugs. 2012;29(8):639–59.
25. Chavant F, Favrelière S, Lafay-Chebassier C, Plazanet C, Pérault-Pochat M-C. Memory

- disorders associated with consumption of drugs: updating through a case/noncase study in the French Pharmacovigilance Database. *Br J Clin Pharmacol*. 2011 Dec;72(6):898–904.
26. Health Canada. Summary Safety Review: IMOVANE (zopiclone) - Next-Day Impairment. 2014.
  27. Mah L, Upshur REG. Long term benzodiazepine use for insomnia in patients over the age of 60 : discordance of patient and physician perceptions. 2002;6:1–6.
  28. Iliffe S, Curran H V, Collins R, Yuen Kee SC, Fletcher S, Woods B. Attitudes to long-term use of benzodiazepine hypnotics by older people in general practice: findings from interviews with service users and providers. *Aging Ment Health*. 2004 May;8(3):242–8.
  29. Barter G, Cormack M. The long-term use of benzodiazepines : patients ' views , accounts and experiences. 1996;13(6):491–7.
  30. Venn S, Arber S. Understanding older peoples' decisions about the use of sleeping medication: issues of control and autonomy. *Sociol Health Illn*. 2012 Nov;34(8):1215–29.
  31. King MB, Rodrigo EK. Long term use of benzodiazepines : the views of patients. 1990;64(May):194–6.
  32. Cook JM, Biyanova T, Masci C, Coyne JC. Older patient perspectives on long-term anxiolytic benzodiazepine use and discontinuation: a qualitative study. *J Gen Intern Med*. 2007 Aug;22(8):1094–100.
  33. Jennings S, Murphy N, McElwee D, Al E. Reluctance of older people to discontinue long-term benzodiazepines and related hypnotics. *JAGS*. 2010;58(6):1205–6.
  34. Dionne P-A, Vasiliadis H-M, Latimer E, Berbiche D, Preville M. Economic impact of inappropriate benzodiazepine prescribing and related drug interactions among elderly persons. *Psychiatr Serv* [Internet]. 2013 Apr 1 [cited 2015 Aug 7];64(4):331–8. Available from: <http://www.ncbi.nlm.nih.gov/pubmed/23242458>
  35. CIHI. The use of psychotropic drugs among seniors on public drug programs in Canada, 2001 to 2010. 2012.
  36. Morgan S et al. Canadian Rx Atlas, 3rd Edition. 2013.
  37. Voshaar RCO, Krabbe PFM, Gorgels WJMJ, Zitman FG. Tapering Off Benzodiazepines in Long-Term Users An Economic Evaluation. 2006;24(7):683–94.
  38. Singh D. Economic evaluation of benzodiazepines versus cognitive behavioural therapy among older adults with chronic insomnia [Internet]. [cited 2015 Aug 7]. Available from: [https://papyrus.bib.umontreal.ca/xmlui/bitstream/handle/1866/9935/Dharmender\\_Singh\\_2012\\_memoire.pdf](https://papyrus.bib.umontreal.ca/xmlui/bitstream/handle/1866/9935/Dharmender_Singh_2012_memoire.pdf)

**Appendix 6. BZRA deprescribing guideline patient information pamphlet.**
